# Supplementary material
Source: ML conference proceedings conference paper supplement (https://openreview.net/forum?id=aAW7ibNYOT)
Supplement: supplementary_material [file Appendix.pdf › Supplementary Material/Appendix.pdf]

## A Sufficient Condition to Assumption 3.2

Proposition 3.3 requires an upper bound on  $\|\nabla\varphi_0(x)\|_2$ . The following result shows that such a bound can be derived from appropriate concentration properties of  $\mu$  and  $\nu$ . We begin with a definition describing the right-tail concentration behavior of the target measure  $\nu$ :

**Definition A.1.** Let  $\nu$  be a probability measure on  $\mathbb{R}^d$ . For function  $f : \mathbb{R}^d \rightarrow \mathbb{R}$ , we denote  $\nu f := \int f(x) \nu(dx) = \mathbb{E}_{X \sim \nu}[f(X)]$ .

1.  $X \sim \nu$  satisfies a Gaussian concentration inequality with constant  $\beta > 0$ , if for any 1-Lipschitz function  $f$  and any  $r \geq 0$ ,

$$\mathbb{P}(f(X) - \nu f \geq r) \leq \exp(-\beta \cdot r^2/2). \quad (24)$$

2.  $X \sim \nu$  satisfies an exponential concentration inequality with constant  $\alpha > 0$ , if for any 1-Lipschitz function  $f$ , and any  $r \geq 0$ ,

$$\mathbb{P}(f(X) - \nu f \geq r) \leq \exp(-\alpha r). \quad (25)$$

3.  $X \sim \nu$  satisfies a Polynomial concentration inequality with constant  $\gamma, C_\gamma, r_0 > 0$ , if for any 1-Lipschitz function  $f$  and any  $r \geq r_0 \geq 0$ ,

$$\mathbb{P}(f(X) - \nu f \geq r) \leq C_\gamma \cdot r^{-\gamma}. \quad (26)$$

We now present a sufficient condition for Assumption 3.2.

**Proposition A.2** (Sufficient condition to Assumption 3.2). Suppose  $\mu$  has density  $p(x) = \exp(-V(x))$ , and suppose there exists a function  $M : \mathbb{R} \rightarrow \mathbb{R}$  such that

$$\|\nabla V(x)\|_2 \leq M(r), \quad \text{for all } x \in B(0, r)$$

Let  $\nabla\varphi_0$  be the OT map from  $\mu$  to  $\nu$ . Then,

1. If  $\nu$  satisfies Equation (24),

$$\|\nabla\varphi_0(x)\|_2 \leq \sqrt{\frac{128}{\beta} \left( (\|x\|_2 + 6\sqrt{d}) \cdot M(\|x\|_2 + 4\sqrt{d}) + V(0) - \log C_d \right)}$$

2. If  $\nu$  satisfies Equation (25),

$$\|\nabla\varphi_0(x)\|_2 \leq \frac{8}{\alpha} \left( (\|x\|_2 + 6\sqrt{d}) \cdot M(\|x\|_2 + 4\sqrt{d}) + V(0) - \log C_d \right).$$

3. If  $\nu$  satisfies Equation (26),

$$\log\left(\frac{\|\nabla\varphi_0(x)\|_2}{8}\right) \leq \frac{1}{\gamma} \left( (\|x\|_2 + 6\sqrt{d}) \cdot M(\|x\|_2 + 4\sqrt{d}) + V(0) - \log(C_d/C_\gamma) \right).$$

where  $C_d := \frac{\pi^{\frac{d}{2}}}{\Gamma(\frac{d}{2}+1)} (2\sqrt{d})^d$ .

*Proof of Proposition A.2.* The proposition is indeed a direct extension of Theorem 1.1 in [2]. We only focus on the case where  $\nu$  satisfies the Gaussian concentration inequality (24). The two remaining cases can be handled by exactly the same argument.

Without loss of generality, assume

$$\|\nabla\varphi_0(x)\|_2 \geq 8(1 + \|x\|_2^2), \quad \|\nabla\varphi_0(x)\|_2 \geq 6\sqrt{d}.$$

Otherwise the bound is trivial.

For an arbitrary  $x$ , define  $u := \frac{\nabla\varphi_0(x) - x}{\|\nabla\varphi_0(x) - x\|_2}$ . Meanwhile, define  $f : \mathbb{R}^d \rightarrow \mathbb{R}$  as

$$f(z) := \langle z - \nabla\varphi_0(x), u \rangle + \frac{1}{2} \|z - \nabla\varphi_0(x)\|_2.$$

From the proof of Theorem 1.1 of [2],  $f$  is  $3/2$ -lipschitz, and  $\nabla\varphi_0(B) \subset \{f \geq 0\}$ , where  $B := B(x + 4\sqrt{d} \cdot u, 2\sqrt{d})$ . Moreover, it holds that

$$\int f d\mu \leq -\|\nabla\varphi_0(x)\|_2/8, \quad \text{for all } x.$$

Since  $\nu$  satisfies Equation (24), we have:  $\mathbb{P}(f(X) - \nu f \geq r) \leq \exp(-\beta \cdot r^2/2)$ .

Meanwhile, since  $\nu$  is standard Gaussian, for some  $C > 0$ ,

$$\nu(\nabla\varphi_0(B)) \leq \nu(\{f \geq 0\}) \leq \nu\left(\left\{f \geq \int f d\nu + \frac{\|\nabla\varphi_0(x)\|_2}{8}\right\}\right) \leq \exp\left\{-\frac{\beta}{128}\|\nabla\varphi_0(x)\|_2^2\right\}.$$

On the other hand, we can lower bound  $\mu(B)$  as

$$\begin{aligned} \mu(B) &= \int_{B(x+4\sqrt{d}u, 2\sqrt{d})} p(v) dv = \int_{B(0, 2\sqrt{d})} p(x + 4\sqrt{d}u + v) dv \\ &\geq \int_{B(0, 2\sqrt{d})} p(x + 4\sqrt{d}u) \cdot \exp\{-2\sqrt{d} \cdot M(\|x\|_2 + 4\sqrt{d})\} dv \\ &= \gamma(B(0, 2\sqrt{d})) \cdot \exp\{-2\sqrt{d} \cdot M(\|x\|_2 + 4\sqrt{d}) - V(x + 4\sqrt{d}u)\} \\ &= C_d \cdot \exp\{-2\sqrt{d} \cdot M(\|x\|_2 + 4\sqrt{d}) - V(x + 4\sqrt{d}u)\} \end{aligned} \quad (27)$$

where  $C_d := \frac{\pi^{\frac{d}{2}}}{\Gamma(\frac{d}{2}+1)} (2\sqrt{d})^d$  is the volume of the ball  $B(0, 2\sqrt{d})$ . Now combining  $\mu(B) \leq \nu(\nabla\varphi_0(B))$ , we have

$$C_d \cdot \exp\{-2\sqrt{d} \cdot M(\|x\|_2 + 4\sqrt{d}) - V(x + 4\sqrt{d}u)\} \leq \exp\left\{-\frac{\beta}{128}\|\nabla\varphi_0(x)\|_2^2\right\}$$

Thus

$$\begin{aligned} \frac{\beta}{128}\|\nabla\varphi_0(x)\|_2^2 &\leq 2\sqrt{d} \cdot M(\|x\|_2 + 4\sqrt{d}) + V(x + 4\sqrt{d}u) - \log C_d \\ &\leq 2\sqrt{d} \cdot M(\|x\|_2 + 4\sqrt{d}) + M(\|x\|_2 + 4\sqrt{d})(\|x\|_2 + 4\sqrt{d}) + V(0) - \log C_d \\ &\leq (\|x\|_2 + 6\sqrt{d}) \cdot M(\|x\|_2 + 4\sqrt{d}) + V(0) - \log C_d \end{aligned} \quad (28)$$

Re-organizing terms in Equation (28) gives an upper bound of  $\|\nabla\varphi_0(x)\|_2$ :

$$\|\nabla\varphi_0(x)\|_2 \leq \sqrt{\frac{128}{\beta} \left( (\|x\|_2 + 6\sqrt{d}) \cdot M(\|x\|_2 + 4\sqrt{d}) + V(0) - \log C_d \right)}$$

□

**Example.** Let  $\mu$  has density  $\mu \propto \exp(-\|x\|_2^{2p}/2)$  for some  $p > 0$ , and  $Y \sim \nu$  has polynomial tails, i.e.,  $\nu(\|Y\|_2 > t) \lesssim t^{-q}$  for some  $q > 0$ . Then, it holds that

$$\|\nabla\varphi_0(x)\|_2 \lesssim \exp\left(c \cdot \frac{p}{q}\|x\|_2^{2p}\right) =: l(x),$$

where  $c > 0$  is only related to  $p$ . Furthermore, when  $q > 8cp$ , we have  $l(X) \in L^4(\mu)$ .

*Proof.* We first show that  $\nu$  satisfies Equation (26).

For any 1-Lipschitz function  $f$ , let  $m := |\nu f - f(0)|$ , it holds that

$$f(Y) - \nu f \leq f(Y) - f(0) + m \leq \|Y\|_2 + m$$

Then for any  $r > 2m$ ,

$$\nu(\{f(Y) - \nu f \geq r\}) \leq \nu(\{\|Y\|_2 \geq r - m\}) \leq \nu(\{\|Y\|_2 \geq \frac{r}{2}\}) \lesssim \left(\frac{r}{2}\right)^{-q}$$

Hence, polynomial concentration inequality (26) holds with constant  $C_\gamma = 2^q$  and  $\gamma = q$ .

Now we apply Proposition A.2 with

$$V(x) = \frac{1}{2} \|x\|_2^{2p}, \quad M(r) = p r^{2p-1}.$$

The Proposition gives

$$\log\left(\frac{\|\nabla\varphi_0(x)\|_2}{8}\right) \lesssim \frac{1}{q} \left( (\|x\|_2 + 6\sqrt{d}) p (\|x\|_2 + 4\sqrt{d})^{2p-1} - \log \frac{C_d}{C_\gamma} \right).$$

Exponentiating and absorbing constants into a single  $c > 0$  yields

$$\|\nabla\varphi_0(x)\|_2 \lesssim 8 \cdot C_{p,q,d} \exp \left\{ c \frac{p}{q} \|x\|_2^{2p} \right\} =: l(x),$$

where the suppressed constants come from the definitions of  $\mu, \nu$ . Constant  $C_{p,q,d}$  is only related to  $p, q, d$ , and constant  $c$  is only related to  $p$ .

In the last step, we check the integrability of  $l(X)$ . Recall  $\mu$  has density  $p(x) \propto \exp(-\|x\|_2^{2p}/2)$ , we have

$$\int l(x)^4 \mu(dx) \lesssim \int \exp \left\{ \left( 4c \frac{p}{q} - \frac{1}{2} \right) \cdot \|x\|_2^{2p} \right\} dx$$

RHS is integrable when  $4c \frac{p}{q} - \frac{1}{2} < 0$ . Hence, when  $q > 8cp$ ,  $l(X) \in L^4(\mu)$ .

□

## B Proof of Proposition 3.3

*Proof of Proposition 3.3.* Let  $y = \nabla\varphi_0(x)$ , and  $z = x + \frac{1}{D_x}(y - \nabla\varphi(x))$ . Note that  $z$  is a point totally determined by  $x$ , and  $D_x > 0$  to be specified.

Note that  $z$  lies in a bigger ball  $B(0, r(x))$ , i.e.

$$\|z\|_2 \leq \|x\|_2 + \frac{1}{D_x} u(x) =: r(x)$$

In particular, if we want to restrict  $x, z \in B(0, R)$ , it is sufficient to restrict  $x$  within the area  $\{x : r(x) \leq R\}$ .

We begin by proving that the sieved convex conjugate  $\varphi_R^*(y)$  satisfies a quadratic lower bound: The second order Taylor expansion of  $\varphi$  gives

$$\varphi(z) \leq \varphi(x) + \langle \nabla\varphi(x), z - x \rangle + \frac{1}{2} U_2(r) \cdot \|z - x\|_2^2 \quad (29)$$

Then on  $\{x : r(x) \leq R\}$ , the corresponding  $z$  lies in  $B(0, R)$ . Replacing  $\varphi(z)$  with its quadratic upper bound derived in Equation (29), the sieved convex conjugate restricted on  $B(0, R)$  satisfies

$$\begin{aligned} \varphi_R^*(y) &\geq \langle z, y \rangle - \varphi(z) \geq \langle z, y \rangle - \varphi(x) - \langle \nabla\varphi(x), z - x \rangle - \frac{1}{2} U_2(r) \cdot \|z - x\|_2^2 \\ &\geq \langle x, y \rangle - \varphi(x) + \frac{1}{D_x} \|y - \nabla\varphi(x)\|_2^2 - \frac{1}{2} U_2(r) \cdot \frac{1}{D_x^2} \|y - \nabla\varphi(x)\|_2^2 \\ &= \varphi_0(x) + \varphi_0^*(y) - \varphi(x) + \frac{1}{D_x} \|y - \nabla\varphi(x)\|_2^2 \cdot \left(1 - \frac{U_2(r)}{2D_x}\right) \\ &\geq \varphi_0(x) + \varphi_0^*(y) - \varphi(x) + \frac{1}{2D_x} \|y - \nabla\varphi(x)\|_2^2, \end{aligned} \quad (30)$$

where the last inequality holds if  $D_x \geq U_2(r(x))$ . Re-organizing Equation (30) gives

$$\frac{1}{2D_x} \|y - \nabla\varphi(x)\|_2^2 \leq \varphi(x) + \varphi_R^*(y) - \varphi_0(x) - \varphi_0^*(y) \quad (31)$$

Note that

$$D_x := U_2(\|x\|_2 + u(x)) \geq U_2\left(\|x\|_2 + \frac{u(x)}{D_x}\right) = U_2(r(x)),$$

Thus, we set  $D_x := U_2(\|x\|_2 + u(x)) \geq 1$ . Consequently,

$$r(x) = \|x\|_2 + \frac{u(x)}{U_2(\|x\|_2 + u(x))}$$

Now we define  $R_\varepsilon, \tilde{R}_\varepsilon$  as

$$\mu(\|X\|_2 > R_\varepsilon) \leq \varepsilon, \quad \tilde{R}_\varepsilon \geq \sup_{\|x\|_2 \leq R_\varepsilon} \left\{ \|x\|_2 + \frac{u(x)}{U_2(\|x\|_2 + u(x))} \right\} \quad (32)$$

It then holds that, for any  $x \in B(0, R_\varepsilon), z \in B(0, \tilde{R}_\varepsilon)$ . As a result, Equation (31) holds for any  $x \in B(0, R_\varepsilon)$ .

We integrate both sides of (31) on  $B(0, R_\varepsilon)$  to get

$$\int_{B(0, R_\varepsilon)} \frac{1}{2D_x} \|y - \nabla \varphi(x)\|_2^2 \mu(\mathrm{d}x) \leq \int_{B(0, R_\varepsilon)} \varphi(x) + \varphi_R^*(y) - \varphi_0(x) - \varphi_0^*(y) \mu(\mathrm{d}x) \quad (33)$$

Note that  $1 \leq \frac{2U_2(R_\varepsilon + U_1(R_\varepsilon))}{2D_x}$  on  $B(0, R_\varepsilon)$ , so that

$$\int_{B(0, R_\varepsilon)} \|y - \nabla \varphi(x)\|_2^2 \mu(\mathrm{d}x) \leq 2U_2(R_\varepsilon + U_1(R_\varepsilon)) \cdot \int_{B(0, R_\varepsilon)} \frac{1}{2D_x} \|y - \nabla \varphi(x)\|_2^2 \mu(\mathrm{d}x) \quad (34)$$

Finally, on  $\{\|x\|_2 > R_\varepsilon\}$  we bound  $\|y - \nabla \varphi(x)\|_2 \leq u(x)$  and apply Cauchy–Schwarz Inequality:

$$\int_{\|x\|_2 > R_\varepsilon} \|y - \nabla \varphi(x)\|_2^2 \mu(\mathrm{d}x) \leq \int_{\|x\|_2 > R_\varepsilon} u(x)^2 \mu(\mathrm{d}x) \leq \sqrt{\mu(u^4(X)) \cdot \mu(\|X\|_2 > R_\varepsilon)} \quad (35)$$

Combining (33), (34), and (35), we conclude that

$$\|\nabla \varphi - \nabla \varphi_0\|_{L^2(\mu)}^2 \leq 2U_2(R_\varepsilon + U_1(R_\varepsilon)) \cdot r_\varepsilon(\varphi) + \|u\|_{L^4(\mu)}^2 \cdot \varepsilon^{\frac{1}{2}}, \quad (36)$$

where

$$r_\varepsilon(\varphi) := \int_{B(0, R_\varepsilon)} \varphi(x) + \varphi_{\tilde{R}_\varepsilon}^*(\nabla \varphi_0(x)) \mu(\mathrm{d}x) - \int_{B(0, R_\varepsilon)} \varphi_0(x) + \varphi_0^*(\nabla \varphi_0(x)) \mu(\mathrm{d}x). \quad (37)$$

□

## C Proof of Proposition 3.4

*Proof of Proposition 3.4.* Let  $\varepsilon > 0$  and  $R_\varepsilon$  satisfies  $\mu(\|X\|_2 > R_\varepsilon) \leq \varepsilon$ .

For any estimated distribution  $\mu_n, \nu_m$ , we estimate Brenier potential within  $\mathcal{F}$ , i.e.

$$\tilde{\varphi}_{n,m} := \arg \min_{\varphi \in \mathcal{F}} \mu_n \varphi + \nu_m \varphi_{\tilde{R}_\varepsilon}^* \quad (38)$$

Since  $\tilde{\varphi}_{n,m}$  minimizes the empirical loss, it holds for any  $\bar{\varphi} \in \mathcal{F}$  that

$$\mu_n \tilde{\varphi}_{n,m} + \nu_m \tilde{\varphi}_{n,m, \tilde{R}_\varepsilon}^* \leq \mu_n \bar{\varphi} + \nu_m \bar{\varphi}_{\tilde{R}_\varepsilon}^* \quad (39)$$

Recall the truncated excess risk define in Equation (11):

$$\tilde{r}_{n,m,\varepsilon} := \int_{B(0, R_\varepsilon)} \tilde{\varphi}_{n,m}(x) + \tilde{\varphi}_{n,m, \tilde{R}_\varepsilon}^*(y) - \varphi_0(x) - \varphi_0^*(y) \mu(\mathrm{d}x),$$

where  $y := \nabla \varphi_0(x)$ . We write for brevity

$$\tilde{r}_{n,m} := \tilde{r}_{n,m,\varepsilon}, \quad \mu_\varepsilon f := \int_{\|x\| \leq R_\varepsilon} f(x) \mu(\mathrm{d}x), \quad \nu_\varepsilon g := \int_{y = \nabla \varphi_0(x), \|x\| \leq R_\varepsilon} g(y) \nu(\mathrm{d}y).$$



Then it holds for  $\tilde{r}_{n,m}$  that

$$\begin{aligned}
\tilde{r}_{n,m} &= \mu_\varepsilon(\tilde{\varphi}_{n,m} - \varphi_0) + \nu_\varepsilon(\tilde{\varphi}_{n,m,\tilde{R}_\varepsilon}^* - \varphi_0^*) \\
&= \mu_\varepsilon(\tilde{\varphi}_{n,m} - \bar{\varphi}) + \mu_\varepsilon(\bar{\varphi} - \varphi_0) + \nu_\varepsilon(\tilde{\varphi}_{n,m,\tilde{R}_\varepsilon}^* - \bar{\varphi}_{\tilde{R}_\varepsilon}^*) + \nu_\varepsilon(\bar{\varphi}_{\tilde{R}_\varepsilon}^* - \varphi_0^*) \\
&= \mu_\varepsilon(\tilde{\varphi}_{n,m} - \bar{\varphi}) + \nu_\varepsilon(\tilde{\varphi}_{n,m,\tilde{R}_\varepsilon}^* - \bar{\varphi}_{\tilde{R}_\varepsilon}^*) + \mu_\varepsilon(\bar{\varphi} - \varphi_0) + \nu_\varepsilon(\bar{\varphi}_{\tilde{R}_\varepsilon}^* - \varphi_0^*) \quad (40)
\end{aligned}$$

The last two terms are approximation errors for  $\varphi_0$  and  $\varphi_0^*$ . It's easy to see  $|\mu_\varepsilon(\bar{\varphi} - \varphi_0)| \leq \|\bar{\varphi} - \varphi_0\|_{L^\infty(B(0,\tilde{R}_\varepsilon))}$ . Now we consider the upper bound of  $\nu_\varepsilon(\bar{\varphi}_{\tilde{R}_\varepsilon}^* - \varphi_0^*)$ . Take  $u^* \in B(0,\tilde{R}_\varepsilon)$  which attains the supremum in  $\bar{\varphi}_{\tilde{R}_\varepsilon}^*(y)$ , it holds that

$$\begin{aligned}
\bar{\varphi}_{\tilde{R}_\varepsilon}^*(y) - \varphi_0^*(y) &= \sup_{\|u\|_2 \leq \tilde{R}_\varepsilon} \{\langle u, y \rangle - \bar{\varphi}(u)\} - \sup_{u \in \mathbb{R}} \{\langle u, y \rangle - \varphi_0(u)\} \\
&\leq \langle u^*, y \rangle - \bar{\varphi}(u^*) - \langle u^*, y \rangle + \varphi_0(u^*) \leq \|\bar{\varphi} - \varphi_0\|_{L^\infty(B(0,\tilde{R}_\varepsilon))} \quad (41)
\end{aligned}$$

While Equation (41) provides an upper bound for  $\bar{\varphi}_{\tilde{R}_\varepsilon}^* - \varphi_0^*$ , by  $\varphi_0(x) + \varphi_0^*(\nabla \varphi_0(x)) = \langle x, \nabla \varphi_0(x) \rangle$ , the lower bound follows that

$$\begin{aligned}
\nu_\varepsilon(\bar{\varphi}_{\tilde{R}_\varepsilon}^* - \varphi_0^*) &= \int_{B(0,R_\varepsilon)} \sup_{\|u\|_2 \leq \tilde{R}_\varepsilon} \{\langle u, \nabla \varphi_0(x) \rangle - \bar{\varphi}(u)\} - \langle x, \varphi_0(x) \rangle + \varphi_0(x) \mu(dx) \\
&\geq \int_{B(0,R_\varepsilon)} \langle x, \nabla \varphi_0(x) \rangle - \bar{\varphi}(x) - \langle x, \varphi_0(x) \rangle + \varphi_0(x) \mu(dx) \\
&= \int_{B(0,R_\varepsilon)} \varphi_0(x) - \bar{\varphi}(x) \mu(dx), \quad (42)
\end{aligned}$$

where the first inequality holds because  $R_\varepsilon \leq \tilde{R}_\varepsilon$ . Thus, combining Equations (41) and (42), we have

$$|\nu_\varepsilon(\bar{\varphi}_{\tilde{R}_\varepsilon}^* - \varphi_0^*)| \leq \|\bar{\varphi} - \varphi_0\|_{L^\infty(B(0,\tilde{R}_\varepsilon))},$$

Now Equation (40) can be bounded as

$$\tilde{r}_{n,m} \leq \mu_\varepsilon(\tilde{\varphi}_{n,m} - \bar{\varphi}) + \nu_\varepsilon(\tilde{\varphi}_{n,m,\tilde{R}_\varepsilon}^* - \bar{\varphi}_{\tilde{R}_\varepsilon}^*) + 2\|\bar{\varphi} - \varphi_0\|_{L^\infty(B(0,\tilde{R}_\varepsilon))}$$

Combine with Equation (39),

$$\tilde{r}_{n,m} \leq (\mu_\varepsilon - \mu_n)(\tilde{\varphi}_{n,m} - \bar{\varphi}) + (\nu_\varepsilon - \nu_m)(\tilde{\varphi}_{n,m,\tilde{R}_\varepsilon}^* - \bar{\varphi}_{\tilde{R}_\varepsilon}^*) + 2\|\bar{\varphi} - \varphi_0\|_{L^\infty(B(0,\tilde{R}_\varepsilon))} \quad (43)$$

Next, since  $\tilde{\varphi}_{n,m}, \bar{\varphi} \in \mathcal{F}$ , their difference lies in  $\bar{\mathcal{F}}$ , where  $\bar{\mathcal{F}} := \{\varphi_1 - \varphi_2 : \varphi_1, \varphi_2 \in \mathcal{F}\}$ . The first term on RHS can be bounded as

$$(\mu_n - \mu_\varepsilon)(\bar{\varphi} - \tilde{\varphi}_{n,m}) \leq \sup_{f \in \bar{\mathcal{F}}} \int_{B(0,R_\varepsilon)} f d(\mu - \mu_n) + 2\mathbb{E}_{X \sim \mu_n}[\Phi(X) \cdot \mathbb{I}(\|X\|_2 > R_\varepsilon)] \quad (44)$$

where  $\bar{\mathcal{F}} := \{\varphi_1 - \varphi_2 : \varphi_1, \varphi_2 \in \mathcal{F}\}$ . The first term on the RHS represents the statistical error, and the second error comes from sieving.

Similarly, for conjugate function class  $\bar{\mathcal{G}} := \{g := \varphi_{1,\tilde{R}_\varepsilon}^* - \varphi_{2,\tilde{R}_\varepsilon}^* : \varphi_1, \varphi_2 \in \mathcal{F}\}$  with envelope function  $G(\cdot)$ ,

$$\varphi_{\tilde{R}_\varepsilon}^*(y) = \sup_{x \in B(0,\tilde{R}_\varepsilon)} \langle x, y \rangle - \varphi(x) \leq \tilde{R}_\varepsilon \|y\|_2 + \sup_{x \in B(0,\tilde{R}_\varepsilon)} \Phi(x) =: G(y)$$

The second term on the RHS of Equation (43) can be bounded and decomposed in the same way,

$$\begin{aligned}
(\nu_m - \nu_\varepsilon)(\bar{\varphi}^* - \tilde{\varphi}_{n,m}^*) &\leq \sup_{g \in \bar{\mathcal{G}}} \int_{\nabla \varphi_0 B(0,R_\varepsilon)} g d(\nu - \nu_m) + 2\mathbb{E}_{Y \sim \nu_m}[G(Y) \cdot \mathbb{I}(Y \in (\nabla \varphi_0 B(0,R_\varepsilon))^c)] \\
&= \sup_{g \in \bar{\mathcal{G}}} \int_{\nabla \varphi_0 B(0,R_\varepsilon)} g d(\nu - \nu_n) + 2\mathbb{E}_{Y \sim \nu_m}[G(Y) \cdot \mathbb{I}(\|(\nabla \varphi_0)^{-1}(Y)\|_2 > R_\varepsilon)] \quad (45)
\end{aligned}$$

Therefore, combine (43),(44) and (45), we have

$$\begin{aligned}\tilde{r}_{n,m} \leq & 2\|\bar{\varphi} - \varphi_0\|_{L^\infty(B(0,\tilde{R}_\varepsilon))} + \sup_{f \in \bar{\mathcal{F}}} \int_{B(0,R_\varepsilon)} f d(\mu - \mu_n) + 2\mathbb{E}_{X \sim \mu_n}[\Phi(X) \cdot \mathbb{I}(\|X\|_2 > R_\varepsilon)] \\ & + \sup_{g \in \bar{\mathcal{G}}} \int_{\nabla \varphi_0 B(0,R_\varepsilon)} g d(\nu - \nu_m) + 2\mathbb{E}_{Y \sim \nu_m}[G(Y) \cdot \mathbb{I}(\|(\nabla \varphi_0)^{-1}(Y)\|_2 > R_\varepsilon)]\end{aligned}$$

The stated oracle inequality holds with the following definitions of the three error components.

$$\begin{aligned}\mathcal{E}_{stat} &:= \sup_{f \in \bar{\mathcal{F}}} \int_{B(0,R_\varepsilon)} f d(\mu_n - \mu) + \sup_{g \in \bar{\mathcal{G}}} \int_{B(0,R_\varepsilon)} g d(\nu_m - \nu), \\ \mathcal{E}_{sieve} &:= 2\mathbb{E}_{X \sim \mu_n}[\Phi(X) \cdot \mathbb{I}(\|X\|_2 > R_\varepsilon)] + 2\mathbb{E}_{Y \sim \nu_m}[G(Y) \cdot \mathbb{I}(\|(\nabla \varphi_0)^{-1}(Y)\|_2 > R_\varepsilon)], \\ \mathcal{E}_{app} &:= 2 \inf_{\varphi \in \bar{\mathcal{F}}} \|\varphi - \varphi_0\|_{L^\infty(B(0,\tilde{R}_\varepsilon))}.\end{aligned}$$

□

## D Proof of Theorem 3.6

In this appendix, we state a complete version of Theorem 3.6 and provide its proof.

**Theorem D.1** (Statistical Error with Empirical Distribution). *Under assumptions of Proposition 3.4, and Assumption 3.5, the sieved estimator  $\tilde{\varphi}_{n,m}$  from Equation (8), computed with empirical measures  $\mu_n$  and  $\nu_m$ , satisfies:*

$$\mathbb{E}[\mathcal{E}_{stat}] \lesssim \sqrt{\frac{D_{\mathcal{F}}}{n}} \left( R_\varepsilon^{\frac{\eta}{2}} + \sup_{x \in B(0,R_\varepsilon)} \Phi(x)^{\frac{1}{2}} \right) \log(n)^{\frac{\gamma'}{2}} + \sqrt{\frac{D_{\mathcal{F}}}{m}} \left( \tilde{R}_\varepsilon^{\frac{\eta}{2}} + M^{\frac{1}{2}} \right) \log(m)^{\frac{\gamma'}{2}}, \quad (46)$$

and

$$\mathbb{E}[\mathcal{E}_{sieve}] \leq 2(\|\Phi\|_{L^2(\mu)} + \|G\|_{L^2(\nu)}) \cdot \varepsilon^{\frac{1}{2}}, \quad (47)$$

where  $M := \tilde{R}_\varepsilon \sup_{x \in B(0,R_\varepsilon)} \|\nabla \varphi_0(x)\|_2 + \sup_{x \in B(0,\tilde{R}_\varepsilon)} \Phi(x)$ , and the suppressed constant depends only on  $\gamma, \gamma'$ . Moreover, the bounds also hold in high probability, i.e. with probability at least  $1 - \delta_1 - \delta_2$ :

$$\begin{aligned}\mathcal{E}_{stat} &\lesssim \sqrt{\frac{D_{\mathcal{F}}}{n}} \left( R_\varepsilon^{\frac{\eta}{2}} + \sup_{x \in B(0,R_\varepsilon)} \Phi(x)^{\frac{1}{2}} \right) \log(n)^{\frac{\gamma'}{2}} + \sqrt{\frac{D_{\mathcal{F}}}{m}} \left( \tilde{R}_\varepsilon^{\frac{\eta}{2}} + M^{\frac{1}{2}} \right) \log(m)^{\frac{\gamma'}{2}} \\ &\quad + n^{-\frac{1}{2}} F \cdot \log^{\frac{1}{2}}\left(\frac{2}{\delta_1}\right) + m^{-\frac{1}{2}} M \cdot \log^{\frac{1}{2}}\left(\frac{2}{\delta_2}\right),\end{aligned}$$

where  $F := \sup_{x \in B(0,R_\varepsilon)} 2\Phi(x)$ . And with probability at least  $1 - \delta_3 - \delta_4$ :

$$\mathcal{E}_{sieve} \leq 2(\|\Phi\|_{L^2(\mu)} + \|G\|_{L^2(\nu)}) \cdot \varepsilon^{\frac{1}{2}} + n^{-\frac{1}{2}} 2\sqrt{\mu(\Phi^2(X))} \cdot \delta_3^{-\frac{1}{2}} + m^{-\frac{1}{2}} 2\sqrt{\nu(G^2(Y))} \cdot \delta_4^{-\frac{1}{2}}$$

**Remark D.2.** In the  $\mathcal{E}_{sieve}$  we only derive polynomial-type high-probability bounds, as they follow directly from the finite-moment assumptions on  $\Phi(X)$ . Under stronger tail conditions (e.g. sub-Gaussian or sub-Weibull concentration), one can replace these moment-based estimates with exponential-type concentration inequalities to obtain substantially sharper high-probability guarantees.

*Proof of Theorem D.1. Step 1. Bounding the statistical error  $\mathcal{E}_{stat}$ :* We first consider

$$\sup_{f \in \bar{\mathcal{F}}} \int_{B(0,R_\varepsilon)} f d(\mu - \mu_n)$$

We can take  $\bar{\mathcal{F}}_\varepsilon := \{f \cdot \mathbb{I}(B(0,R_\varepsilon)) : f \in \bar{\mathcal{F}}\}$  as a new function class, which is bounded w.r.t.  $\|\cdot\|_{L^\infty}$  norm, i.e.

$$\sup_{f \in \bar{\mathcal{F}}} \left\{ \|f \cdot \mathbb{I}(B(0,R_\varepsilon))\|_{L^\infty} \right\} \leq \sup_{x \in B(0,R_\varepsilon)} 2\Phi(x) =: F.$$

Since  $B(0, R_\varepsilon) \subset [-R_\varepsilon, R_\varepsilon]^d$ , it holds that

$$\log \mathcal{N}(h, \bar{\mathcal{F}}_\varepsilon, \|\cdot\|_{L^\infty}) \leq \log \mathcal{N}(h, \mathcal{F}, L^\infty([-R_\varepsilon, R_\varepsilon]^d))$$

We also observe that  $\bar{\mathcal{F}}_\varepsilon$  can be recovered by expanding the restricted class  $\mathcal{F}_\varepsilon$ , i.e.

$$\bar{\mathcal{F}}_\varepsilon = \{\varphi_1 \cdot \mathbb{I}(B(0, R_\varepsilon)) - \varphi_2 \cdot \mathbb{I}(B(0, R_\varepsilon))\}.$$

So by Lemma F.2, we get the covering number of  $\bar{\mathcal{F}}_\varepsilon$ :

$$\begin{aligned} \log \mathcal{N}(h, \bar{\mathcal{F}}_\varepsilon, \|\cdot\|_{L^\infty}) &\leq \log \mathcal{N}(h/3, \mathcal{F}, \|\cdot\|_{L^\infty}) + 6F \log_+(1/h) \\ &\lesssim D_{\mathcal{F}} \cdot h^{-\gamma} \cdot \log_+(1/h)^{\gamma'} \cdot R_\varepsilon^\eta + F \cdot \log_+(1/h) \end{aligned} \quad (48)$$

Lemma F.1 provides the expectation and high probability upper bounds for  $\sup_{f \in \bar{\mathcal{F}}} \int_{B(0, R_\varepsilon)} f d(\mu - \mu_n)$ : For any  $\xi > 0$ ,

$$\mathbb{P}\left(\sup_{f \in \bar{\mathcal{F}}} \int f d(\mu_n - \mu) \geq \mathbb{E}\left[\sup_{f \in \bar{\mathcal{F}}} \int f d(\mu_n - \mu)\right] + \xi\right) \leq 2 \exp\left\{-\frac{n\xi^2}{2F^2}\right\} \quad (49)$$

and

$$\mathbb{E}\left[\sup_{f \in \bar{\mathcal{F}}} \int f d(\mu_n - \mu)\right] \leq 2 \inf_{0 < \delta < F} \left(2\delta + \frac{12}{\sqrt{n}} \int_\delta^F \sqrt{\log \mathcal{N}(h, \bar{\mathcal{F}}_\varepsilon, \|\cdot\|_{L^\infty})} dh\right). \quad (50)$$

A straightforward calculation then yields

$$\begin{aligned} \int_\delta^F h^{-\frac{\gamma}{2}} \cdot \log_+(1/h)^{\frac{\gamma'}{2}} dh &= \int_\delta^e h^{-\frac{\gamma}{2}} \cdot \log_+(1/h)^{\frac{\gamma'}{2}} dh \\ &\leq \int_\delta^{1/e} h^{-\frac{\gamma}{2}} \cdot \log_+(1/\delta)^{\frac{\gamma'}{2}} dh \leq \log_+(1/\delta)^{\frac{\gamma'}{2}} \frac{1}{1-\gamma/2} (e^{\frac{\gamma}{2}-1} - \delta^{1-\frac{\gamma}{2}}) \\ &\lesssim \log_+(1/\delta)^{\frac{\gamma'}{2}}, \end{aligned} \quad (51)$$

and

$$\int_\delta^{1/e} \log_+(1/h)^{\frac{1}{2}} dh \leq \log_+(1/\delta)^{\frac{1}{2}} (e^{-1} - \delta) \lesssim \log_+(1/\delta)^{\frac{1}{2}} \quad (52)$$

Since  $\sqrt{a+b} \leq \sqrt{a} + \sqrt{b}$ , Combining Equations (50), (51) and (52) yields that

$$\begin{aligned} \mathbb{E}\left[\sup_{f \in \bar{\mathcal{F}}} \int f d(\mu_n - \mu)\right] &\leq 2 \inf_{0 < \delta < F} \left(2\delta + \frac{12}{\sqrt{n}} \int_\delta^F \sqrt{\log \mathcal{N}(h, \bar{\mathcal{F}}_\varepsilon, \|\cdot\|_{L^\infty})} dh\right), \\ &\lesssim \inf_{0 < \delta < F} \left(\delta + n^{-\frac{1}{2}} D_{\mathcal{F}}^{\frac{1}{2}} R_\varepsilon^{\frac{\eta}{2}} \log_+(1/\delta)^{\frac{\gamma'}{2}} + n^{-\frac{1}{2}} F^{\frac{1}{2}} \cdot \log_+(1/\delta)^{\frac{1}{2}}\right) \\ &\leq n^{-\frac{1}{2}} D_{\mathcal{F}}^{\frac{1}{2}} R_\varepsilon^{\frac{\eta}{2}} \log_+(n)^{\frac{\gamma'}{2}} + n^{-\frac{1}{2}} F^{\frac{1}{2}} \cdot \log_+(n)^{\frac{1}{2}}, \end{aligned} \quad (53)$$

where we suppressed constants related to  $\gamma, \gamma'$ , and the last inequality holds by taking  $\delta = n^{-\frac{1}{2}}$ . Taking  $\xi = n^{-\frac{1}{2}} F \cdot \log^{\frac{1}{2}}(\frac{2}{\delta_1})$ , combining with Equation (49), it holds that with probability at least  $1 - \delta_1$

$$\sup_{f \in \bar{\mathcal{F}}} \int_{B(0, R_\varepsilon)} f d(\mu - \mu_n) \leq n^{-\frac{1}{2}} D_{\mathcal{F}}^{\frac{1}{2}} R_\varepsilon^{\frac{\eta}{2}} \log_+(n)^{\frac{\gamma'}{2}} + n^{-\frac{1}{2}} F^{\frac{1}{2}} \cdot \log_+(n)^{\frac{1}{2}} + n^{-\frac{1}{2}} F \cdot \log^{\frac{1}{2}}\left(\frac{2}{\delta_1}\right) \quad (54)$$

Now we consider

$$\sup_{g \in \bar{\mathcal{G}}} \int_{\nabla \varphi_0 B(0, R_\varepsilon)} g d(\nu - \nu_m)$$

Recall  $\bar{\mathcal{G}} := \{\varphi_{\bar{R}_\varepsilon}^* : \varphi \in \mathcal{F}\}$  with

$$\|\varphi_{\bar{R}_\varepsilon}^* - \varphi_{\bar{R}_\varepsilon}^*\|_{L^\infty} \leq \|\varphi_1 - \varphi_2\|_{L^\infty(B(0, \bar{R}_\varepsilon))} \leq \|\varphi_1 - \varphi_2\|_{L^\infty[-\bar{R}_\varepsilon, \bar{R}_\varepsilon]^d}$$

It implies that

$$\log \mathcal{N}(h, \bar{\mathcal{G}}, \|\cdot\|_{L^\infty}) \leq \log \mathcal{N}(h, \mathcal{F}, L^\infty([-\bar{R}_\varepsilon, \bar{R}_\varepsilon]^d))$$

We also note that  $G(y) = \tilde{R}_\varepsilon \|y\|_2 + \sup_{x \in B(0, \tilde{R}_\varepsilon)} \Phi(x)$  is the envelope function for  $\mathcal{G}$ . We can first restrict it to  $\mathcal{G}_\varepsilon$ :

$$\mathcal{G}_\varepsilon := \{g \cdot \mathbb{I}(\nabla \varphi_0 B(0, R_\varepsilon)) \mid g \in \mathcal{G}\},$$

which is bounded in  $\|\cdot\|_{L^\infty}$  norm, i.e.

$$\sup_{g \in \mathcal{G}} \left\{ \left\| g \cdot \mathbb{I}(\nabla \varphi_0 B(0, R_\varepsilon)) \right\|_{L^\infty} \right\} \leq \tilde{R}_\varepsilon \sup_{x \in B(0, R_\varepsilon)} \|\nabla \varphi_0(x)\| + \sup_{x \in B(0, \tilde{R}_\varepsilon)} \Phi(x) =: M,$$

and then expand  $\mathcal{G}_\varepsilon$  to  $\bar{\mathcal{G}}_\varepsilon$ . Similar to the tricks in step 1, Lemma F.2 implies the covering number for  $\bar{\mathcal{G}}_\varepsilon$ , i.e.

$$\begin{aligned} \log \mathcal{N}(h, \bar{\mathcal{G}}_\varepsilon, \|\cdot\|_{L^\infty}) &\leq \log \mathcal{N}(h/3, \mathcal{G}_\varepsilon, \|\cdot\|_{L^\infty}) + 6M \log_+(1/h) \\ &\lesssim D_{\mathcal{F}} \cdot h^{-\gamma} \cdot \log_+(1/h)^{\gamma'} \cdot \tilde{R}_\varepsilon^\eta + M \cdot \log_+(1/h) \end{aligned} \quad (55)$$

By applying Lemma F.1, one can repeat the procedures in for  $\bar{\mathcal{F}}$  to have

$$\mathbb{P}\left(\sup_{g \in \bar{\mathcal{G}}_\varepsilon} \int g d(\nu_m - \nu) \geq \mathbb{E}\left[\sup_{g \in \bar{\mathcal{G}}_\varepsilon} \int g d(\nu_m - \nu)\right] + \varepsilon\right) \leq 2 \exp\left\{-\frac{m\varepsilon^2}{2M^2}\right\} \quad (56)$$

and

$$\mathbb{E}\left[\sup_{g \in \bar{\mathcal{G}}_\varepsilon} \int g d(\nu_m - \nu)\right] \leq m^{-\frac{1}{2}} D_{\mathcal{F}}^{\frac{1}{2}} \tilde{R}_\varepsilon^\eta \log_+(m)^{\frac{\gamma'}{2}} + m^{-\frac{1}{2}} M^{\frac{1}{2}} \cdot \log_+(m)^{\frac{1}{2}}, \quad (57)$$

Combining Equations (53) and (57), we have

$$\begin{aligned} \mathbb{E}[\mathcal{E}_{stat}] &\lesssim n^{-\frac{1}{2}} D_{\mathcal{F}}^{\frac{1}{2}} R_\varepsilon^{\frac{\eta}{2}} \log_+(n)^{\frac{\gamma'}{2}} + n^{-\frac{1}{2}} \sup_{x \in B(0, R_\varepsilon)} \Phi^{\frac{1}{2}}(x) \cdot \log_+(n)^{\frac{1}{2}} \\ &\quad + m^{-\frac{1}{2}} D_{\mathcal{F}}^{\frac{1}{2}} \tilde{R}_\varepsilon^{\frac{\eta}{2}} \log_+(m)^{\frac{\gamma'}{2}} + m^{-\frac{1}{2}} M^{\frac{1}{2}} \cdot \log_+(m)^{\frac{1}{2}}. \end{aligned}$$

And Equations (54) and (56) provide that with high probability  $1 - \delta_1 - \delta_2$ :

$$\begin{aligned} \mathcal{E}_{stat} &\lesssim n^{-\frac{1}{2}} D_{\mathcal{F}}^{\frac{1}{2}} R_\varepsilon^{\frac{\eta}{2}} \log_+(n)^{\frac{\gamma'}{2}} + n^{-\frac{1}{2}} F^{\frac{1}{2}} \cdot \log_+(n)^{\frac{1}{2}} + n^{-\frac{1}{2}} F \cdot \log_+^{\frac{1}{2}}\left(\frac{2}{\delta_1}\right) \\ &\quad + m^{-\frac{1}{2}} D_{\mathcal{F}}^{\frac{1}{2}} \tilde{R}_\varepsilon^{\frac{\eta}{2}} \log_+(m)^{\frac{\gamma'}{2}} + m^{-\frac{1}{2}} M^{\frac{1}{2}} \cdot \log_+(m)^{\frac{1}{2}} + m^{-\frac{1}{2}} M \cdot \log_+^{\frac{1}{2}}\left(\frac{2}{\delta_2}\right) \end{aligned}$$

Since  $\gamma' \geq 1$  and  $D_{\mathcal{F}} > 1$ , re-organizing terms yields the stated bounds for  $\mathcal{E}_{stat}$ .

**Step 2. Bounding the sieve error  $\mathcal{E}_{sieve}$ :** We first consider the source part  $2\mathbb{E}_{X \sim \mu_n}[\Phi(X) \cdot \mathbb{I}(\|X\|_2 > R_\varepsilon)]$ , where  $\mu_n := \frac{1}{n} \sum_{i=1}^n \mathbb{I}(x = X_i)$  is the (random) empirical distribution with  $X_i \sim \mu$  i.i.d. We apply Cauchy inequality to get

$$\mathbb{E}\left[2\mathbb{E}_{X \sim \mu_n}[\Phi(X) \cdot \mathbb{I}(\|X\|_2 > R_\varepsilon)]\right] = \frac{1}{n} \sum_{i=1}^n \mathbb{E}\left[(2\Phi(X) \cdot \mathbb{I}(\|X\|_2 > R_\varepsilon))\right] \leq 2\sqrt{\mu(\Phi^2(X))} \varepsilon^{\frac{1}{2}} \quad (58)$$

By Chebyshev inequality and  $\text{Var}(2\Phi(X) \mathbb{I}(\|X\|_2 > R_\varepsilon)) \leq E(4\Phi^2(X))$ , we have

$$\mathbb{P}\left(\left|\mu_n(2\Phi(X) \cdot \mathbb{I}(\|X\|_2 > R_\varepsilon)) - \mathbb{E}[\mu_n(2\Phi(X) \cdot \mathbb{I}(\|X\|_2 > R_\varepsilon))]\right| > \xi\right) \leq \frac{4\mu(\Phi^2(X))}{n\xi^2}$$

Taking  $\xi = n^{-\frac{1}{2}} 2\sqrt{\mu(\Phi^2(X))} \cdot \delta_3^{-\frac{1}{2}}$ , it holds that with probability at least  $1 - \delta_3$ ,

$$\mu_n(2\Phi(X) \cdot \mathbb{I}(\|X\|_2 > R_\varepsilon)) \leq 2\sqrt{\mu(\Phi^2(X))} \varepsilon^{\frac{1}{2}} + n^{-\frac{1}{2}} 2\sqrt{\mu(\Phi^2(X))} \cdot \delta_3^{-\frac{1}{2}} \quad (59)$$

For the target part, still letting  $G(y) := \tilde{R}_\varepsilon \|y\|_2 + \sup_{x \in B(0, \tilde{R}_\varepsilon)} \Phi(x)$ , then similarly,

$$\begin{aligned} \mathbb{E}\left[2\mathbb{E}_{Y \sim \nu_m}[G(Y) \cdot \mathbb{I}(\|(\nabla \varphi_0)^{-1}(Y)\|_2 > R_\varepsilon)]\right] &\leq 2\sqrt{\nu(G^2(Y))} \varepsilon^{\frac{1}{2}} \\ &\leq 2\sqrt{\tilde{R}_\varepsilon^2 \cdot \nu(Y^2) + \sup_{x \in B(0, \tilde{R}_\varepsilon)} \Phi(x)^2} \cdot \varepsilon^{\frac{1}{2}} \end{aligned} \quad (60)$$

And with probability at least  $1 - \delta_4$

$$2\mathbb{E}_{Y \sim \nu_m} [G(Y) \cdot \mathbb{I}(\|(\nabla \varphi_0)^{-1}(Y)\|_2 > R_\varepsilon)] \leq 2\sqrt{\nu(G^2(Y))\varepsilon^{\frac{1}{2}}} + m^{-\frac{1}{2}} 2\sqrt{\nu(G^2(Y))} \cdot \delta_4^{-\frac{1}{2}} \quad (61)$$

Combine Equations (58) and (60), we have

$$\mathbb{E}[\mathcal{E}_{sieve}] \leq 2\sqrt{\mu(\Phi^2(X))\varepsilon^{\frac{1}{2}}} + 2\sqrt{\nu(G^2(Y))\varepsilon^{\frac{1}{2}}}$$

Meanwhile, by (59) and (61), with probability at least  $1 - \delta_3 - \delta_4$ ,

$$\begin{aligned} \mathcal{E}_{sieve} &\leq 2\sqrt{\mu(\Phi^2(X))\varepsilon^{\frac{1}{2}}} + n^{-\frac{1}{2}} 2\sqrt{\mu(\Phi^2(X))} \cdot \delta_3^{-\frac{1}{2}} \\ &\quad + 2\sqrt{\nu(G^2(Y))\varepsilon^{\frac{1}{2}}} + m^{-\frac{1}{2}} 2\sqrt{\nu(G^2(Y))} \cdot \delta_4^{-\frac{1}{2}} \end{aligned}$$

□

## E Proof of Theorem 3.7

In this appendix, we state a complete version of Theorem 3.7 and provide its proof.

**Theorem E.1** (OT Estimation via Tanh Neural Network). *Let  $n = m$ , and suppose  $\mu$  is  $(\lambda, K)$ -sub-Weibull, and the true Brenier potential  $\varphi_0 \in C^\alpha(\mathbb{R}^d)$  with  $\alpha \geq 2$  is  $(\beta, b)$ -smooth. By setting  $R_\varepsilon, \tilde{R}_\varepsilon$  according to Equation (10), there exists a  $(\beta, k + b + 1)$ -smooth deep TNN function class  $\mathcal{F} := \mathcal{F}(L, W, \kappa)$ , with*

$$3 \leq L = \mathcal{O}(1), \quad W = \mathcal{O}(N^d), \quad \kappa = \mathcal{O}(N^{\frac{d(d+(\lfloor \alpha \rfloor + 2)^2 + 4) + 2}{2}}),$$

where  $N$  is the network size parameter, such that the sieved estimator  $\nabla \tilde{\varphi}_n$  with sieve radius

$$\tilde{R}_n = C_{K,d,\alpha} \cdot (\log n)^{\frac{1}{\lambda}}, \quad \text{for some constant } C_{K,d,\alpha} \geq 4K \frac{2\alpha}{d + 2\alpha} + 2 \quad (62)$$

satisfies

$$\mathbb{E} \|\nabla \tilde{\varphi}_n - \nabla \varphi_0\|_{L^2(\mu)}^2 \lesssim_{\log n} n^{-\frac{\alpha}{d+2\alpha}}. \quad (63)$$

*Proof of Theorem 3.7.* We first build the candidate TNN class  $\mathcal{F}$ .

Since  $\mu$  is  $(\lambda, K)$ -sub-Weibull, for any  $\varepsilon > 0$  we can choose  $R_\varepsilon = K \left( \log \frac{2}{\varepsilon} \right)^{1/\lambda}$ , so that  $\mu(\|X\|_2 > R_\varepsilon) \leq \varepsilon$ . By the assumption that  $\varphi_0$  is  $(\beta, b)$ -smooth, it holds that

$$\|\nabla^2 \varphi_0(x)\|_{op} \leq \beta \langle x \rangle^b, \quad \|\nabla \varphi_0(x)\|_2 \leq \beta \langle x \rangle^{b+1} + \beta, \quad |\varphi_0(x)| \leq \beta \langle x \rangle^{b+2} + \beta$$

Fix any  $\tilde{R}_\varepsilon \geq R_\varepsilon$  to be determined, it follows that  $\|\varphi_0\|_{W^{2,\infty}([- \tilde{R}_\varepsilon, \tilde{R}_\varepsilon]^d)} \leq 3\beta \langle \tilde{R}_\varepsilon \rangle^{b+2}$ . Then we apply lemma F.4 to have: there exists an two hidden layers Tanh Neural Network  $\varphi_N$  in  $\mathcal{F}_N$  with width  $\mathcal{O}(N^d)$ , and parameters bounded by  $\mathcal{O}(N^{\frac{d(d+(\lfloor \alpha \rfloor + 2)^2 + 4) + 2}{2}})$ , such that

$$\begin{aligned} \|\varphi_N - \varphi_0\|_{L^\infty([- \tilde{R}_\varepsilon, \tilde{R}_\varepsilon]^d)} &\lesssim \log(\tilde{R}_\varepsilon) \langle \tilde{R}_\varepsilon \rangle^{k+b+2} N^{-\alpha} \\ \|\nabla \varphi_N - \nabla \varphi_0\|_{L^\infty([- \tilde{R}_\varepsilon, \tilde{R}_\varepsilon]^d)} &\lesssim \log(\tilde{R}_\varepsilon) \langle \tilde{R}_\varepsilon \rangle^{k+b+1} \\ \|\nabla^2 \varphi_N\|_{op,([- \tilde{R}_\varepsilon, \tilde{R}_\varepsilon]^d)} &\lesssim \log(\tilde{R}_\varepsilon) \langle \tilde{R}_\varepsilon \rangle^{k+b}, \end{aligned} \quad (64)$$

Equivalently, if we choose a subclass  $\mathcal{F} \subset \mathcal{F}_N$  consisting of all  $\varphi$  that is  $(\beta, k + b + 1)$ -smooth:

$$\|\nabla^2 \varphi(x)\|_{op} \leq \beta \langle x \rangle^{k+b+1} := \beta \langle x \rangle^{b'}$$

then the network approximation  $\varphi_N$  produced by Lemma F.4 automatically lies in  $\mathcal{F}$ .

Given the growing rate of  $\mathcal{F}$ , now we determine  $\tilde{R}_\varepsilon$ .

Recall in Proposition 3.3, with  $\|\nabla \varphi(x) - \nabla \varphi_0(x)\|_2 \leq u(x) := \beta \langle x \rangle^{b'+1}$ ,  $U_2(R) := \beta \langle x \rangle^{b'}$ , it holds that

$$\tilde{R}_\varepsilon \geq 2\langle R_\varepsilon \rangle \geq R_\varepsilon + \sup_{\|x\|_2 \leq R_\varepsilon} \frac{u(x)}{U_2(\|x\|_2 + u(x))}$$

So we set  $\tilde{R}_\varepsilon := 2\langle R_\varepsilon \rangle$ .

With Propositions 3.3 (stability) and 3.4 (oracle inequality) in hand, we are now ready to derive the desired convergence rate.

Denote the truncated excess risk as

$$\tilde{r}_n := \int_{B(0, R_\varepsilon)} (\tilde{\varphi}_n(x) + \tilde{\varphi}_{n, \tilde{R}_\varepsilon}^*(y) - \varphi_0(x) - \varphi_0^*(y)) \mu(dx),$$

Since  $\tilde{\varphi}_n \in \mathcal{F}$ , Proposition 3.3 gives that

$$\begin{aligned} \|\nabla \tilde{\varphi}_n - \nabla \varphi_0\|_{L^2(\mu)}^2 &\leq 2U_2(R_\varepsilon + U_1(R_\varepsilon)) \cdot r_\varepsilon(\varphi) + \|u\|_{L^4(\mu)}^2 \cdot \varepsilon^{\frac{1}{2}} \\ &\lesssim \langle R_\varepsilon \rangle^{b'(b'+1)} \cdot \tilde{r}_n + \varepsilon^{\frac{1}{2}}. \end{aligned} \quad (65)$$

And Proposition 3.4 further gives that

$$\tilde{r}_n \leq \mathcal{E}_{app} + \mathcal{E}_{sieve} + \mathcal{E}_{stat},$$

with

$$\begin{aligned} \mathcal{E}_{app} &:= 2 \inf_{\varphi \in \mathcal{F}} \|\varphi - \varphi_0\|_{L^\infty(B(0, \tilde{R}_\varepsilon))} \lesssim \log(\tilde{R}_\varepsilon) \langle \tilde{R}_\varepsilon \rangle^{k+b+2} N^{-\alpha} \quad (\text{By Equation (64)}) \\ \mathcal{E}_{sieve} &:= 2\mathbb{E}_{X \sim \mu_n} [\Phi(X) \cdot \mathbb{I}(\|X\|_2 > R_\varepsilon)] + 2\mathbb{E}_{Y \sim \nu_n} [G(Y) \cdot \mathbb{I}(\|(\nabla \varphi_0)^{-1}(Y)\|_2 > R_\varepsilon)] \\ \mathcal{E}_{stat} &:= \sup_{f \in \mathcal{F}} \int_{B(0, R_\varepsilon)} f d(\mu - \mu_n) + \sup_{g \in \tilde{\mathcal{G}}} \int_{B(0, R_\varepsilon)} g d(\nu_n - \nu), \end{aligned} \quad (66)$$

where  $\Phi(x) := \beta \langle x \rangle^{b'+2}$ ,  $G(y) := \tilde{R}_\varepsilon \|y\|_2 + \beta \langle \tilde{R}_\varepsilon \rangle^{b'+2}$ . Thus, it remains to control the statistical error.

Given the architecture of Tanh NN, the covering number has an upper bound through Proposition 1 of [9], i.e.

$$\log \mathcal{N}(\delta, \mathcal{F}, \|\cdot\|_\infty) \lesssim N^d \log N \log_+(\frac{1}{\delta}) \quad (67)$$

Note that Equation (67) indicates that  $\gamma = 0, \gamma' = 1, \eta = 0$  and  $D_{\mathcal{F}} = N^d \log N$  as defined in Assumption 3.5. Plugging this bound in Theorem D.1, we have

$$\begin{aligned} \mathbb{E} \mathcal{E}_{stat} &\lesssim n^{-\frac{1}{2}} (N^{\frac{d}{2}} \log^{\frac{1}{2}} N + R_\varepsilon^{\frac{b'+2}{2}}) \cdot \log(n)^{\frac{\gamma' \vee 1}{2}} \\ \mathbb{E} \mathcal{E}_{sieve} &\lesssim R_\varepsilon^{b'+2} \varepsilon^{\frac{1}{2}} \end{aligned} \quad (68)$$

Consequently, it holds for  $\tilde{r}_n$  that

$$\begin{aligned} \tilde{r}_n &\lesssim \log(\tilde{R}_\varepsilon) \langle \tilde{R}_\varepsilon \rangle^{b'+1} N^{-\alpha} + n^{-\frac{1}{2}} (N^{\frac{d}{2}} \log^{\frac{1}{2}} N + R_\varepsilon^{\frac{b'+2}{2}}) \cdot \log(n)^{\frac{\gamma' \vee 1}{2}} + R_\varepsilon^{b'+2} \varepsilon^{\frac{1}{2}} \\ &\lesssim_{\log n} n^{-\frac{\alpha}{d+2\alpha}} \log(\tilde{R}_\varepsilon) R_\varepsilon^{b'+1} + R_\varepsilon^{b'+2} \varepsilon^{\frac{1}{2}} \end{aligned}$$

where the last equality holds by utilizing  $\gamma' = 1$  and taking  $N = O(n^{\frac{1}{d+2\alpha}})$ . Combine with (65), we have

$$\mathbb{E} \|\nabla \varphi_0 - \nabla \tilde{\varphi}_n\|_{L^2(\mu)}^2 \lesssim_{\log n} \langle R_\varepsilon \rangle^{b'(b'+1)} \cdot \left( n^{-\frac{\alpha}{d+2\alpha}} \log(\tilde{R}_\varepsilon) R_\varepsilon^{b'+1} + R_\varepsilon^{b'+2} \varepsilon^{\frac{1}{2}} \right) + \varepsilon^{\frac{1}{2}} \quad (69)$$

$$\lesssim_{\log n} n^{-\frac{\alpha}{d+2\alpha}} \quad (70)$$

where the last equality holds by taking  $\varepsilon = O(n^{-\frac{2\alpha}{d+2\alpha}})$ .  $\square$

## F Auxillary Lemmas

### F.1 Supporting Lemmas for Theorem 3.6

**Lemma F.1.** *For a symmetric function class  $\mathcal{F}$  with  $\sup_{f \in \mathcal{F}} \|f\|_{L^\infty} \leq M$  for a constant  $M$ , define  $d_{\mathcal{F}}(\mu, \nu) := \sup_{f \in \mathcal{F}} \int f d(\mu - \nu)$  and let  $\hat{\mu}_n$  to be i.i.d empirical distribution, then we have*

$$\mathbb{P}\left(\left|d_{\mathcal{F}}(\hat{\mu}_n, \mu) - \mathbb{E}[d_{\mathcal{F}}(\hat{\mu}_n, \mu)]\right| \geq \varepsilon\right) \leq 2 \exp\left\{-\frac{n\varepsilon^2}{2M^2}\right\}$$

and

$$\mathbb{E}[d_{\mathcal{F}}(\mu_n, \mu)] \leq 2 \inf_{0 < \delta < M} \left( 2\delta + \frac{12}{\sqrt{n}} \int_{\delta}^M \sqrt{\log \mathcal{N}(\epsilon, \mathcal{F}, \|\cdot\|_{\infty})} d\epsilon \right),$$

where  $\mathcal{N}(\epsilon, \mathcal{F}, \|\cdot\|_{L^\infty})$  denotes the  $\epsilon$ -covering number of  $\mathcal{F}$  with respect to the  $\|\cdot\|_{L^\infty}$  norm.

*Proof of Lemma F.1.* Let  $X_1, X_2, \dots, X_n \sim \mu$  to be i.i.d samples,

$$d_{\mathcal{F}}(\hat{\mu}_n, \mu) = \sup_{f \in \mathcal{F}} \left| \frac{1}{n} \sum_{i=1}^n f(X_i) - \frac{1}{n} \sum_{i=1}^n \mathbb{E}f(X_i) \right|$$

To apply McDiarmid's inequality on the function

$$G(x_1, x_2, \dots, x_n) := \sup_{f \in \mathcal{F}} \left| \frac{1}{n} \sum_{i=1}^n f(x_i) - \frac{1}{n} \sum_{i=1}^n \mathbb{E}f(X_i) \right|,$$

we need to verify the self-bounding property when varying each single coordinate. Denote  $\mu_n^{\setminus i} f = \frac{1}{n} \sum_{j \neq i} \delta_{x_j} + \delta_{x'_i}$ , then

$$\begin{aligned} & \sup_{x_1, \dots, x_n, x_i, x'_i} |G(x_1, \dots, x_i, \dots, x_n) - G(x_1, \dots, x'_i, \dots, x_n)| \\ &= \sup_{x_1, \dots, x_n, x_i, x'_i} \left| \sup_{f \in \mathcal{F}} |\mu_n f - \mu f| - \sup_{f \in \mathcal{F}} |\mu_n^{\setminus i} f - \mu f| \right| \\ &\leq \sup_{x_1, \dots, x_n, x_i, x'_i} \sup_{f \in \mathcal{F}} |\mu_n f - \mu f - (\mu_n^{\setminus i} f - \mu f)| \\ &= \sup_{x_1, \dots, x_n, x_i, x'_i} \sup_{f \in \mathcal{F}} \left| \frac{1}{n} f(x_i) - \frac{1}{n} f(x'_i) \right| \\ &\leq \frac{1}{n} \sup_{f \in \mathcal{F}} \sup_{x, x'} |f(x) - f(x')| \leq \frac{1}{n} \sup_{f \in \mathcal{F}} (\sup_x |f(x)| + \sup_{x'} |f(x')|) \\ &= \frac{2}{n} \sup_{f \in \mathcal{F}} \|f\|_{\infty} \leq \frac{2}{n} M, \quad i = 1, \dots, n. \end{aligned}$$

Thus McDiarmid's inequality gives the first inequality:

$$\begin{aligned} & \mathbb{P} \left( \left| G(X_1, X_2, \dots, X_n) - \mathbb{E}[G(X_1, X_2, \dots, X_n)] \right| \geq \varepsilon \right) \\ &= \mathbb{P} \left( \left| d_{\mathcal{F}}(\hat{\mu}_n, \mu) - \mathbb{E}[d_{\mathcal{F}}(\hat{\mu}_n, \mu)] \right| \geq \varepsilon \right) \leq 2 \exp \left\{ -\frac{n\varepsilon^2}{2M^2} \right\} \end{aligned}$$

The second inequality is indeed Lemma 7 of [1]. The proof utilizes the symmetrization technique and Dudley's entropy integral, which can be found in empirical process theory [11]. We omit the proof here. □

**Lemma F.2** (Covering Numbers for Expanded Class). *Suppose class  $\mathcal{F}$  is bounded in norm  $\|\cdot\|$ , i.e.  $\sup_{f \in \mathcal{F}} \|f\| \leq F$ . Let  $\bar{\mathcal{F}} := \{(1-t)\varphi_1 + t\varphi_2 : \varphi_1, \varphi_2 \in \mathcal{F}, t \in [0, 1]\}$ , we have*

$$\log \mathcal{N}(h, \bar{\mathcal{F}}, \|\cdot\|) \leq \log \mathcal{N}(h/3, \mathcal{F}, \|\cdot\|) + 6F \log_+(1/h)$$

*Proof of Lemma F.2.* For any  $f_1 := (1-t)\varphi_1 + t\varphi_2, f_2 := (1-\tilde{t})\tilde{\varphi}_1 + \tilde{t}\tilde{\varphi}_2 \in \bar{\mathcal{F}}$ , it holds that

$$f_1 - f_2 = (1-t)(\varphi_1 - \tilde{\varphi}_1) + t(\varphi_2 - \tilde{\varphi}_2) - (t - \tilde{t})(\tilde{\varphi}_1 - \tilde{\varphi}_2)$$

Then

$$\|f_1 - f_2\| \leq \|\varphi_1 - \tilde{\varphi}_1\| + \|\varphi_2 - \tilde{\varphi}_2\| + 2F|t - \tilde{t}|$$

Therefore, any  $\frac{h}{3}$ -covering of  $\mathcal{F}$  and  $\frac{h}{6F}$ -covering of  $[0, 1]$  can form a  $h$ -covering of  $\bar{\mathcal{F}}$ .

$$\log \mathcal{N}(h, \bar{\mathcal{F}}, \|\cdot\|) \leq \log \mathcal{N}(h/3, \mathcal{F}, \|\cdot\|) + 6F \log_+(1/h) \quad \square$$

□

## F.2 Properties of Tanh Neural Networks

Here we use the standard multi-index notation. A *multi-index*  $\beta$  is a  $d$ -tuple

$$\beta = (\beta_1, \dots, \beta_d) \in \mathbb{N}_0^d, \quad |\beta| := \sum_{i=1}^d \beta_i, \quad D^\beta := \frac{\partial^{\beta_1}}{\partial x_1^{\beta_1}} \cdots \frac{\partial^{\beta_d}}{\partial x_d^{\beta_d}}.$$

**Lemma F.3** (Extension of Theorem 5.1 in [3]). *Let  $d, s \in \mathbb{N}$ ,  $B > 0$ , and suppose  $f \in W^{s,\infty}([-B, B]^d)$ , then there exists a two layers tanh neural network  $f_N$ , with widths of order  $O(N^d)$ , parameters bounded by  $O(B^{-\frac{s^2}{2}} \|f\|_{W^{s,\infty}([-B, B]^d)} N^{\frac{d(d+s^2+4)}{2}})$ , such that*

$$\|f - f_N\|_{W^{k,\infty}([-B, B]^d)} \lesssim C_{d,s} \log(B \|f\|_{W^{s,\infty}([-B, B]^d)} N) \frac{B^{s-k} \|f\|_{W^{s,\infty}([-B, B]^d)}}{N^{s-k}},$$

for any  $0 \leq k \leq s-1$ , where  $N$  is the network size parameter.

*Proof of Lemma F.3.* We will construct a two-layer tanh network  $f_N$  on  $[-B, B]^d$  by rescaling  $f$  to  $[0, 1]^d$  and applying Theorem 5.1 of [3], then rescaling back.

Let  $g(y) := f(2By - B\mathbf{1}_d)$ , so  $g(\cdot)$  has domain on  $[0, 1]^d$ . Here, we write  $\mathbf{1}_d = (1, 1, \dots, 1)^\top \in \mathbb{R}^d$  to denote the  $d$ -dimensional column vector of all ones.

Then  $g$  is  $s$ -times differentiable on  $[0, 1]^d$ , and by the chain rule, for any multi-index  $\beta$  with  $|\beta| \leq s$ ,

$$D^\beta g(y) = (2B)^{|\beta|} D^\beta f(2By - B\mathbf{1}_d).$$

Hence

$$\|g\|_{W^{s,\infty}([0,1]^d)} = \max_{|\alpha| \leq s} \sup_{y \in [0,1]^d} |D^\alpha g(y)| \leq (2B)^s \|f\|_{W^{s,\infty}([-B, B]^d)}.$$

Now we approximate  $g$  using TNN. By applying Theorem 5.1 of [3], we immediately have a two layers tanh neural network  $g_N$ , for any  $0 \leq k \leq s-1$ , such that

$$\|g - g_N\|_{W^{k,\infty}([0,1]^d)} \lesssim C_{d,s} \log(B \|f\|_{W^{s,\infty}([-B, B]^d)} N) \frac{B^s \|f\|_{W^{s,\infty}([-B, B]^d)}}{N^{s-k}},$$

where  $C_{d,s}$  is constant only related to  $d, s$ . According to the same theorem,  $g_N$  has widths of order  $N^d$ , parameters bounded by  $O(B^{-\frac{s^2}{2}} \|f\|_{W^{s,\infty}([-B, B]^d)} N^{\frac{d(d+s^2+4)}{2}})$ .

In the last step, we rescaling  $g_N$  back to  $[-B, B]^d$ . Let  $f_N(x) := g_N(\frac{x}{2B} + \frac{1}{2}\mathbf{1}_d)$ , so that

$$\|f - f_N\|_{W^{k,\infty}([-B, B]^d)} \lesssim C_{d,s} \log(B \|f\|_{W^{s,\infty}([-B, B]^d)} N) \frac{B^{s-k} \|f\|_{W^{s,\infty}([-B, B]^d)}}{N^{s-k}},$$

If we write  $g_N(x) = W_2 \cdot \sigma(W_1 x + b_1) + b_2$ , then  $f_N$  can be written as

$$f_N(x) = W_2 \cdot \sigma\left(\frac{1}{2B} W_1 + \frac{1}{2} W_1 \mathbf{1}_d + b_1\right) + b_2$$

One only need to modify weights and biases in the first-layer of  $g_N$ , i.e.  $W'_1 := \frac{1}{2B} W_1$  and  $b'_1 := \frac{1}{2} W_1 \mathbf{1}_d + b_1$ . The overall parameters if  $f_N$  are still bounded by  $O(B^{-\frac{s^2}{2}} \|f\|_{W^{s,\infty}([-B, B]^d)} N^{\frac{d(d+s^2+4)}{2}})$ .  $\square$

**Lemma F.4** (Approximation with Controlled Hessian). *Suppose  $\varphi_0 \in C^\alpha(\mathbb{R}^d)$ , with  $\alpha \geq 2$ . Then for any  $B > 0$  and  $R := \sqrt{d}B$ , there exists an two layers Tanh Neural Network  $\varphi_N$  with width  $O(N^d)$ , and parameters bounded by  $O(c_4(R) N^{\frac{d(d+(\lfloor \alpha \rfloor + 2)^2 + 4)}{2}})$ , such that*

$$\begin{aligned} \|\varphi_0 - \varphi_N\|_{L^\infty([-B, B]^d)} &\lesssim c_7(R) N^{-\alpha} \\ \|\nabla^2 \varphi_N\|_{op,([-B, B]^d)} &\lesssim c_8(R), \end{aligned}$$

where  $c_i(R)$  are constants depend only on  $R, \varphi_0$ , smoothness parameters  $\alpha, k$ , and dimension  $d$ .



*Proof.* We first construct a kernel smoothed  $\varphi_h(\cdot)$  to approximate  $\varphi_0(\cdot)$  on  $B(0, R)$ , where  $R := \sqrt{d}B$ , so that  $[-B, B]^d \subset B(0, R)$ .

Let  $k = \lfloor \alpha \rfloor \geq 1$ , and  $K(\cdot) : \mathbb{R}^d \rightarrow \mathbb{R}$  be a  $C^\infty$  kernel of order  $k$  with compact support, i.e.

$$\int_{\mathbb{R}^d} x^\beta K(x) dx = 0, \quad 0 \leq |\beta| \leq k, \quad \int_{\mathbb{R}^d} \|x\|_2^{k+1} K(x) dx < \infty,$$

where  $\beta = (\beta_1, \dots, \beta_d)$ ,  $|\beta| := \beta_1 + \dots + \beta_d$ , and  $x^\beta := x_1^{\beta_1} \dots x_d^{\beta_d}$ .

For bandwidth  $0 < h < 1$ , we define  $K_h(x) := h^{-d}K(x/h)$  and the smoothed potential

$$\varphi_h(x) = \int_{\mathbb{R}^d} K_h(y) \varphi_0(x - y) dy = \int_{\mathbb{R}^d} \varphi_0(x - ht) K(t) dt.$$

Denote  $\beta! = (\beta_1! \dots \beta_d!)$ ,  $(-ht)^\beta = \prod_{i=1}^d (-ht_i)^{\beta_i}$  and restrict  $x \in B(0, R)$ . Since  $K$  has vanishing moments up to order  $k$ , a Taylor expansion of  $\varphi_0(x - ht)$  around  $x$  to order  $k - 1$  gives

$$\begin{aligned} \varphi_h(x) - \varphi_0(x) &= \int_{\mathbb{R}^d} [\varphi_0(x - y) - \varphi_0(x)] K_h(y) dy \\ &= \int_{\mathbb{R}^d} \left[ \sum_{|\beta| \leq k-1} \frac{(-ht)^\beta}{\beta!} D^\beta \varphi_0(x) + \sum_{|\beta|=k} \frac{(-ht)^\beta}{\beta!} D^\beta \varphi_0(x - \eta ht) \right] K(t) dt \\ &= \sum_{|\beta|=k} \frac{(-h)^\beta}{\beta!} \int_{\mathbb{R}^d} t^\beta D^\beta \varphi_0(x - \eta ht) K(t) dt \\ &= \sum_{|\beta|=k} \frac{(-h)^\beta}{\beta!} \int_{\mathbb{R}^d} t^\beta \left( D^\beta \varphi_0(x - \eta ht) - D^\beta \varphi_0(x) \right) K(t) dt, \end{aligned}$$

where  $\eta \in (0, 1)$ , and the last implication is consequence of the fact that  $K(\cdot)$  is a kernel of order  $k$ .

Let  $L(R)$  be the  $(\alpha - k)$ -Hölder continuity constant of each  $D^\beta \varphi_0$  on  $B(0, R)$ , i.e. for any  $x, y \in B(0, R)$

$$\sup_{|\beta|=\lfloor \alpha \rfloor} \left| D^\beta \varphi_0(x) - D^\beta \varphi_0(y) \right| \leq L(R) \|x - y\|_2^{\alpha - \lfloor \alpha \rfloor}$$

It follows that

$$\left| D^\beta \varphi_0(x - \eta ht) - D^\beta \varphi_0(x) \right| \leq L(R + \|t\|_2) \|\eta ht\|_2^{\alpha - k} \leq L(R + \|t\|_2) h^{\alpha - k} \|t\|_2^{\alpha - k}.$$

Then we obtain the bound

$$\begin{aligned} \left| \varphi_h(x) - \varphi_0(x) \right| &\leq \frac{h^k}{k!} \binom{k+d-1}{k} \int_{\mathbb{R}^d} \|t\|_2^k L(R + \|t\|_2) \|th\|_2^{\alpha - k} K(t) dt \\ &= \frac{h^\alpha}{k!} \binom{k+d-1}{k} \int_{\mathbb{R}^d} L(R + \|t\|_2) \|t\|_2^\alpha K(t) dt \\ &\lesssim W_\alpha(R) \cdot h^\alpha, \end{aligned}$$

where

$$W_\alpha(R) := \int_{\mathbb{R}^d} L(R + \|t\|_2) \|t\|_2^\alpha K(t) dt < \infty$$

The finite is guaranteed by the compact support of  $K(\cdot)$ .

Now we control the Hessian of  $\varphi_h$ . Since convolution commutes with differentiation, it holds that

$$\begin{aligned}
\|\nabla^2 \varphi_h(x)\|_{op} &= \|\nabla^2(\varphi_0 * K_h)(x)\|_{op} = \left\| \int_{\mathbb{R}^d} K_h(y) \nabla^2 \varphi_0(x-y) dy \right\|_{op} \\
&\leq \int_{\mathbb{R}^d} K_h(y) \|\nabla^2 \varphi_0(x-y)\|_{op} dy \\
&= \int_{\mathbb{R}^d} \frac{1}{h^d} K\left(\frac{y}{h}\right) \|\nabla^2 \varphi_0(x-y)\|_{op} dy \\
&= \int_{\mathbb{R}^d} K(t) \|\nabla^2 \varphi_0(x-h t)\|_{op} dt \\
&\leq \int_{\mathbb{R}^d} \sup_{\|u\|_2 \leq R+\|t\|_2} \|\nabla^2 \varphi_0(u)\|_{op} K(t) dt := c_1(R),
\end{aligned}$$

Here and in what follows,  $c_i(R)$  ( $i = 1, 2, \dots$ ) denote positive constants that may change from line to line and depend only on  $R$ ,  $\varphi_0$ , smoothness parameters  $\alpha, k$ , and dimension  $d$ .

Meanwhile, it holds that

$$\|\nabla \varphi_h(0)\|_2 \leq \int_{\mathbb{R}^d} K(t) \|\nabla \varphi_0(-h t)\|_2 dt \leq \int_{\mathbb{R}^d} K(t) \sup_{\|u\|_2 \leq R+\|t\|_2} \|\nabla \varphi_0(u)\|_2 dt$$

Then

$$\|\nabla \varphi_h(x)\|_2 \leq c_1(R)R + \|\nabla \varphi_h(0)\|_2 =: c_2(R)$$

Now it remains construct an TNN  $\varphi_N$  to approximate  $\varphi_h \in C^s \subset C^\infty$ , for any  $s \in \mathbb{N}$ . The approximation property of  $\varphi_h$  gives that

$$\begin{aligned}
\|\varphi_h\|_{W^{2,\infty}([-B,B]^d)} &\leq \|\varphi_h\|_{W^{2,\infty}(B(0,R))} \\
&\leq \|\varphi_0\|_{L^\infty(B(0,R))} + W_\alpha h^\alpha + c_2(R) + c_1(R) \lesssim c_3(R)
\end{aligned}$$

By lemma F.3, there exist a two layers tanh neural network  $\varphi_N$  with width  $O(N^d)$ , and parameters bounded by  $O(c_4(R)N^{\frac{d(d+s^2+4)}{2}})$ , such that

$$\|\varphi_h - \varphi_N\|_{\infty,([-B,B]^d)} \lesssim c_5(R) \frac{1}{N^s}$$

and

$$\|\nabla^2 \varphi_h - \nabla^2 \varphi_N\|_{op,([-B,B]^d)} \lesssim c_6(R) \frac{1}{N^{s-2}},$$

where we only consider  $s \geq 3$ . Since  $\varphi_h$  approximates  $\varphi_0$  at  $O(h^\alpha)$ , we then set  $N^{-s} = h^{\lfloor \alpha \rfloor + 2}$ ,  $h^{-1} = N$ ,  $s = \lfloor \alpha \rfloor + 2$ , and conclude that

$$\begin{aligned}
\|\varphi_0 - \varphi_N\|_{\infty,([-B,B]^d)} &\lesssim (c_5(R) + W_\alpha(R)) N^{-\alpha} := c_7(R) \cdot N^{-\alpha} \\
\|\nabla^2 \varphi_N\|_{op,([-B,B]^d)} &\lesssim c_3(R) + c_6(R) := c_8(R)
\end{aligned}$$

□

**Remark F.5** (Comment to Lemma F.4). For any  $f \in W^{s,\infty}([-B,B]^d)$  with  $s \in \mathbb{N}_0$ , Theorem 5.1 of [3] guarantees a Tanh neural network approximation  $f_N$  of width  $O(N^d)$  such that

$$\|f - f_N\|_{W^{k,\infty}([-B,B]^d)} = O(N^{-(s-k)}), \quad 0 \leq k \leq s-1.$$

In particular, when  $f \in C^\alpha([-B,B]^d)$  with  $2 < \alpha < 3$ , this only yields

$$\|f - f_N\|_{W^{1,\infty}([-B,B]^d)} = O(N^{-1}),$$

and provides no control on the second derivatives  $\|\nabla^2 f_N\|_\infty$ . By contrast, Lemma F.4 slightly extend their results, by showing that for non-integer  $\alpha > 2$ , the same network architecture satisfies

$$\|f - f_N\|_{L^\infty([-B,B]^d)} = O(N^{-\alpha}), \quad \text{and} \quad \|f - f_N\|_{W^{2,\infty}([-B,B]^d)} \leq O(1),$$

i.e. all second derivatives remain uniformly bounded as  $N \rightarrow \infty$ , even  $2 \leq \alpha < 3$ .

**Remark F.6.** We list  $c_i(R)$ 's here:

$$\begin{aligned}
W_\alpha(R) &:= \int_{\mathbb{R}^d} L(R + \|t\|_2) \|t\|_2^\alpha K(t) dt \\
c_1(R) &:= \int_{\mathbb{R}^d} \sup_{\|u\|_2 \leq R + \|t\|_2} \|\nabla^2 \varphi_0(u)\|_{op} K(t) dt \\
c_2(R) &:= c_1(R)R + \int_{\mathbb{R}^d} \sup_{\|u\|_2 \leq R + \|t\|_2} \|\nabla \varphi_0(u)\|_2 K(t) dt \\
c_3(R) &:= \|\varphi_0\|_{L^\infty(B(0,R))} + c_2(R) + c_1(R) \\
c_4(R) &:= R^{-\frac{k^2}{2}} \left( \|\varphi_0\|_{W^{k,\infty}([-B,B]^d)} + \int_{\mathbb{R}^d} \sup_{\|u\|_2 \leq R + \|t\|_2} |\varphi_0(u)| \cdot K(t) dt \right) \\
c_5(R) &:= \log(R \|f\|_{W^{k,\infty}([-B,B]^d)}) R^k \|f\|_{W^{s,\infty}([-B,B]^d)} \\
c_6(R) &:= \log(R \|f\|_{W^{k,\infty}([-B,B]^d)}) R^{k-2} \|f\|_{W^{s,\infty}([-B,B]^d)} \\
c_7(R) &:= c_5(R) + W_\alpha(R) \\
c_8(R) &:= c_3(R) + c_6(R)
\end{aligned}$$

## G Additional Numerical Experiments

In this section, we present numerical simulations to evaluate the performance of our sieved-TNN estimator and compare it against the original dual-type estimators from [7, 25, 21]. We consider four synthetic OT problems that pose challenges for existing theoretical frameworks:

- *Non- $(\beta, b)$ -smooth maps:*  $\mathcal{N}(0, 1) \rightarrow t_6$ ,  $\text{Uniform}(0, 1) \rightarrow \mathcal{N}(0, 1)$ .
- *Non- $(\alpha, a)$ -convex maps:*  $t_6 \rightarrow \mathcal{N}(0, 1)$ ,  $\mathcal{N}(0, 1) \rightarrow \text{Uniform}(0, 1)$ .

We evaluate performance in dimensions  $d = 5, 10, 20$ . For each fixed setting  $(d, \mu, \nu)$ , we draw  $n = m \in \{64, 128, 256, 512, 1024, 2048\}$  i.i.d. samples  $X_i \sim \mu$  and  $Y_j \sim \nu$ , and repeat each experiment over 50 independent trials. For reproducibility, in the  $r$ th trial ( $r = 1, \dots, 50$ ), we set the random seed as  $\text{seed} = 12345 + r$ . This ensures that each of the 50 repetitions uses a distinct, but deterministic, initialization.

All experiments were run on a computational cluster powered by Intel Xeon Gold 6342 processors. Specifically, each experimental setting (i.e. a fixed triple  $(d, \mu, \nu)$ ) was executed on a single 20-core node, allocating 2 GB of RAM per core. In total, our numerical study consumed approximately 4,000 CPU-core hours.

**Data Generation and true OT map  $\nabla \varphi_0$**  To generate multivariate data with dimension  $d$ , we set source and target measures  $\mu$  and  $\nu$  on  $\mathbb{R}^d$  whose coordinates are i.i.d. according to one of three 1-D marginals:  $\mathcal{N}(0, 1)$ ,  $\text{Uniform}(0, 1)$ , or  $t_6$ . Because both  $\mu$  and  $\nu$  have identical, independent marginals, the true OT map  $\nabla \varphi_0$  is a composition of simple 1-D quantile transform applied to each coordinate. Concretely, if  $F$  and  $G$  denote the cumulative distribution functions of the source and target marginals respectively, then the true OT map is

$$\nabla \varphi_0(x) = (G^{-1}(F(x_1)), G^{-1}(F(x_2)), \dots, G^{-1}(F(x_d)))^\top.$$

That is, each component is pushed forward by the 1-D OT map  $x \mapsto G^{-1}(F(x))$ .

**Sieve radius** As discussed in Equation (18), we choose the sieve radius  $\tilde{R}$  as

$$\tilde{R} = \max_{1 \leq i \leq n} \|X_i\|_2 + C \cdot \max_{1 \leq j \leq n} \|Y_j\|_2, \quad C \in \{0, 1, 2, 3, \infty\}.$$

Here,  $C = 0$  corresponds to the setting in [4], while  $C = \infty$  recovers the original dual-type estimator studied in [7, 25, 21], enabling direct comparison.

**Implementation setup** We implement our dual-type sieved TNN estimator  $\tilde{\varphi}_{n,m}$  in PyTorch [10] with objective function in Equation (8). The candidate class  $\mathcal{F}_\Theta$  consists of TNNs with two hidden layers ( $L = 3$ ) of width 10 (for  $d = 5$ ), 20 (for  $d = 10$ ), and 30 (for  $d = 20$ ).

Our implementation follows the algorithms in [4]. In the outer loop (Algorithm 1), we estimate the Brenier potential by solving the sieved empirical semi-dual (Equation 8):

$$\min_{\varphi \in \mathcal{F}} \frac{1}{n} \sum_{i=1}^n \varphi(X_i) + \frac{1}{m} \sum_{j=1}^m \varphi_R^*(Y_j)$$

In the inner loop (Algorithm 2), we compute (sieved) convex conjugates  $\varphi_R^*$  with sieve radius  $\tilde{R}$ . For completeness, we restate both algorithms with TNNs below.

Training proceeds in two phases: a warm-up phase of  $\max\{\lfloor 10000/n \rfloor, 50\}$  epochs at learning rate  $5 \times 10^{-3}$ , followed by 300 epochs at  $10^{-3}$ . In both phases we use mini-batches of size  $n' = m' = 64$  drawn independently from the source and target samples. Within each outer-loop update (Algorithm 1), the inner subproblem for the sieved convex conjugates (Algorithm 2) is solved using 300 iterations.

In each experiment, 10% of the samples are held out for validation. We report the Maximum Mean Discrepancy (MMD) between the transported source samples and target samples, using the Gaussian RBF kernel  $k(x, y) = \exp\left\{-\frac{1}{d} \|x - y\|_2^2\right\}$ .

---

**Algorithm 1** Dual-type OT Map Estimators  $\nabla \tilde{\varphi}_{n,m}$  with TNN

---

**Require:** Samples  $(X_i)_{i=1}^n$  and  $(Y_j)_{j=1}^m$ ; TNN model  $\mathcal{F}_\Theta$ ; number of epochs  $T$ ; batch sizes  $n', m'$ .

- 1: Initialize  $\varphi_\theta \in \mathcal{F}_\Theta$
- 2: **for**  $t = 1, \dots, T$  **do**
- 3:     **for** mini-batch  $(X_{i_k})_{k=1}^{n'}$  in  $(X_i)_{i=1}^n$ , and  $(Y_{j_k})_{k=1}^{m'}$  in  $(Y_j)_{j=1}^m$  **do**
- 4:         Compute  $(\varphi_\theta^*(Y_{j_k}))_{k=1}^{m'}$  with Algorithm 2
- 5:         Compute loss:  $L \leftarrow \frac{1}{n'} \sum_{k=1}^{n'} \varphi_\theta(X_{i_k}) + \frac{1}{m'} \sum_{k=1}^{m'} \varphi_\theta^*(Y_{j_k})$
- 6:         Update  $\theta \in \Theta$  by minimizing  $L$  with Adam
- 7:     **end for**
- 8: **end for**
- 9: **Return**  $\nabla \varphi_\theta$

---



---

**Algorithm 2** Computing the original or sieve convex conjugates

---

**Require:** Function  $\varphi$ ; value  $y \in \mathbb{R}^d$ ; number of iterations  $T$ ; projection radius  $M_n$ .

- 1: Initialize  $x \leftarrow 0$
- 2: **def** closure( $\varphi$ ):
- 3:     Compute loss:  $l \leftarrow \varphi(x) - \langle x, y \rangle$
- 4:     **return**  $l$
- 5: **for**  $t = 1, \dots, T$  **do**
- 6:     Update  $x$  with  $x \leftarrow \text{GradientDescent}(\text{closure}, x)$
- 7:     Project  $x$  onto  $B(0, \tilde{R})$
- 8: **end for**
- 9: Calculate convex conjugate:  $\varphi^*(y) \leftarrow \langle x, y \rangle - \varphi(x)$
- 10: **Return**  $\varphi^*(y)$

---

**Evaluation** We assess the estimation error using unexplained variance proportion (UVP) [8]:  $L^2\text{-UVP}(\nabla \hat{\varphi}_n) := \|\nabla \hat{\varphi}_n - \nabla \varphi_0\|_{L^2(\mu)}^2 / \text{Var}_\nu(\|Y\|_2)$ . Lower values indicate better performance. For each experiment, we approximate the  $L^2$ -UVP using an independent set of  $10^6$  samples.

We report the  $L^2$ -UVP error versus sample size  $n$  for  $d = 5, 10, 20$  in Figure 2 - 4 here.

From here are revised version

**Superior Performance of the Sieved-TNN Estimator** Across all experimental configurations, our sieved TNN estimator exhibits reliable convergence as the sample size  $n$  grows, thereby empirically validating the non-asymptotic convergence derived in Section 3.4.

Moreover, the sieved estimator consistently outperforms the classical dual-type estimator (i.e. with sieve constant  $C = \infty$ ), especially in the small-sample regime. For example, in Figure 4a, the sieve-based estimators achieve lower  $L^2$ -UVP errors for  $n \leq 512$  and smaller variance, whereas the classical estimator only matches their performance once  $n$  becomes large  $n \geq 1024$ . This phenomenon is most evident in the Gaussian  $\rightarrow t_6$  and Uniform  $\rightarrow$  Gaussian transports, across all dimensions considered.

We also observe that sieved estimators with small sieve constants (e.g.  $C = 0$  or 1) not only attain lower training loss but also stabilize earlier on the held-out validation set, compared to those with larger  $C$ . This indicates that overly large sieve radii can complicate the optimization landscape, while a modest radius effectively mitigates these issues without introducing too much sieved bias.

These observations corroborate our theoretical findings: large sieve radii may degrade convergence. These results also offer practical guidance: a modest sieve constant (e.g.  $C = 0$  or 1) is sufficient to yield better and robust performance across a wide range of settings, without incurring too much sieved bias.

**Comparable Training Time** We also compare the computational speed between sieved estimator and the original estimator, since they have different optimization problem of projection. The mean training time between the sieved estimator ( $C = 2$ ) and the original estimator ( $C = \infty$ ) for  $d = 10$  from normal to uniform is summarized in Table 2:

Table 2: Mean training time (in seconds) for the sieved estimator and the original estimator.

| $C$      | 64      | 128      | 256      | 512      | 1024      | 2048      |
|----------|---------|----------|----------|----------|-----------|-----------|
| 2        | 97.8096 | 159.7494 | 293.5467 | 587.9228 | 1107.5363 | 2159.0094 |
| $\infty$ | 85.7766 | 140.1795 | 257.9078 | 513.5465 | 968.8996  | 1890.1076 |

Table 2 shows that the sieved estimator incurs an additional computational cost of approximately 15% due to the projection step. However, we believe this increase in computational time is moderate and acceptable, given the practical benefits of the sieved estimator.

**Parameters in TNNs are Well Bounded** In all our experiment settings, no explicit truncation of the TNN parameters is required in practice, although a theoretical bound  $\kappa = \mathcal{O}(n^{\frac{d(d+(\lfloor \alpha \rfloor + 2)^2 + 4) + 2}{2(d+2\alpha)}})$  is established in Theorem 3.7. This can be understood theoretically and verified experimentally.

Across all settings, the underlying Brenier potentials  $\varphi_0$  are infinitely smooth. Taking the limit  $\alpha \rightarrow \infty$  leads to  $\kappa \rightarrow \infty$ , implying that truncation of TNN parameters becomes unnecessary.

Furthermore, Table 3 reports the mean of maximum TNN parameter over 50 repetitions for  $d = 10$ . The result suggests that parameter values remain small and increase slowly with sample size.

Table 3: Mean of Max Parameter over 50 repetition ( $d = 10$ )

| $C$      | Normal $\rightarrow$ t |       |       |       |       |       | Normal $\rightarrow$ Uniform |       |       |       |       |       |
|----------|------------------------|-------|-------|-------|-------|-------|------------------------------|-------|-------|-------|-------|-------|
|          | 64                     | 128   | 256   | 512   | 1024  | 2048  | 64                           | 128   | 256   | 512   | 1024  | 2048  |
| 0        | 1.188                  | 1.317 | 1.737 | 2.387 | 3.103 | 4.021 | 0.917                        | 0.873 | 1.029 | 1.271 | 1.473 | 1.719 |
| 1        | 1.307                  | 1.551 | 2.039 | 2.814 | 3.617 | 4.529 | 0.890                        | 0.840 | 0.987 | 1.194 | 1.352 | 1.581 |
| 2        | 1.330                  | 1.583 | 2.062 | 2.859 | 3.713 | 4.550 | 0.876                        | 0.829 | 0.968 | 1.146 | 1.316 | 1.521 |
| 3        | 1.340                  | 1.594 | 2.087 | 2.860 | 3.726 | 4.654 | 0.891                        | 0.826 | 0.965 | 1.123 | 1.287 | 1.497 |
| $\infty$ | 1.357                  | 1.620 | 2.108 | 2.849 | 3.682 | 4.563 | 0.893                        | 0.815 | 0.955 | 1.102 | 1.280 | 1.439 |
| $C$      | t $\rightarrow$ Normal |       |       |       |       |       | Uniform $\rightarrow$ Normal |       |       |       |       |       |
|          | 64                     | 128   | 256   | 512   | 1024  | 2048  | 64                           | 128   | 256   | 512   | 1024  | 2048  |
| 0        | 1.195                  | 1.368 | 1.732 | 2.216 | 2.751 | 3.551 | 1.140                        | 1.037 | 1.134 | 1.272 | 1.389 | 1.620 |
| 1        | 1.207                  | 1.413 | 1.776 | 2.309 | 2.888 | 3.968 | 1.110                        | 1.070 | 1.164 | 1.292 | 1.436 | 1.626 |
| 2        | 1.224                  | 1.434 | 1.785 | 2.362 | 2.970 | 3.969 | 1.116                        | 1.125 | 1.220 | 1.337 | 1.468 | 1.627 |
| 3        | 1.236                  | 1.456 | 1.782 | 2.373 | 2.983 | 3.991 | 1.113                        | 1.155 | 1.267 | 1.366 | 1.483 | 1.641 |
| $\infty$ | 1.262                  | 1.467 | 1.757 | 2.354 | 2.966 | 3.977 | 1.135                        | 1.236 | 1.362 | 1.428 | 1.533 | 1.669 |

To further investigate the effect of truncation, we conducted supplementary experiments in which all network parameters were clamped within the range  $\pm 10$  for  $d = 10$  and  $C = 2, \text{inf}$ . The corresponding  $L^2\text{-UVP}$  results are summarized in Table 4. Interestingly, we observed that truncation has a negligible impact on the performance of TNN.

Table 4:  $L^2\text{-UVP}$ , Truncation vs No Truncation ( $d = 10$ )

| $C$           | Normal $\rightarrow$ t |        |        |        |        |        | Normal $\rightarrow$ Uniform |        |        |        |        |        |
|---------------|------------------------|--------|--------|--------|--------|--------|------------------------------|--------|--------|--------|--------|--------|
|               | 64                     | 128    | 256    | 512    | 1024   | 2048   | 64                           | 128    | 256    | 512    | 1024   | 2048   |
| 2 (No)        | 0.4074                 | 0.2591 | 0.1419 | 0.0916 | 0.0648 | 0.0593 | 0.9058                       | 0.2717 | 0.1371 | 0.0720 | 0.0369 | 0.0267 |
| 2 (10)        | 0.4280                 | 0.2589 | 0.1449 | 0.0929 | 0.0654 | 0.0595 | 0.9045                       | 0.2775 | 0.1354 | 0.0703 | 0.0370 | 0.0268 |
| $\infty$ (No) | 0.5823                 | 0.4262 | 0.2340 | 0.0997 | 0.0646 | 0.0588 | 0.8815                       | 0.2745 | 0.1369 | 0.0703 | 0.0364 | 0.0266 |
| $\infty$ (10) | 0.5808                 | 0.4413 | 0.2450 | 0.1016 | 0.0656 | 0.0586 | 0.8862                       | 0.2768 | 0.1357 | 0.0697 | 0.0364 | 0.0266 |

  

| $C$           | t $\rightarrow$ Normal |        |        |        |        |        | Uniform $\rightarrow$ Normal |        |        |        |        |        |
|---------------|------------------------|--------|--------|--------|--------|--------|------------------------------|--------|--------|--------|--------|--------|
|               | 64                     | 128    | 256    | 512    | 1024   | 2048   | 64                           | 128    | 256    | 512    | 1024   | 2048   |
| 2 (No)        | 0.5526                 | 0.3390 | 0.2002 | 0.1094 | 0.0689 | 0.0531 | 0.2765                       | 0.1556 | 0.1055 | 0.0821 | 0.0674 | 0.0616 |
| 2 (10)        | 0.5701                 | 0.3357 | 0.2029 | 0.1104 | 0.0692 | 0.0535 | 0.2779                       | 0.1600 | 0.1077 | 0.0821 | 0.0680 | 0.0617 |
| $\infty$ (No) | 0.5679                 | 0.3678 | 0.2017 | 0.1064 | 0.0664 | 0.0517 | 0.2758                       | 0.1811 | 0.1019 | 0.0788 | 0.0651 | 0.0609 |
| $\infty$ (10) | 0.5686                 | 0.3699 | 0.2065 | 0.1075 | 0.0670 | 0.0526 | 0.2999                       | 0.1863 | 0.1021 | 0.0787 | 0.0652 | 0.0609 |

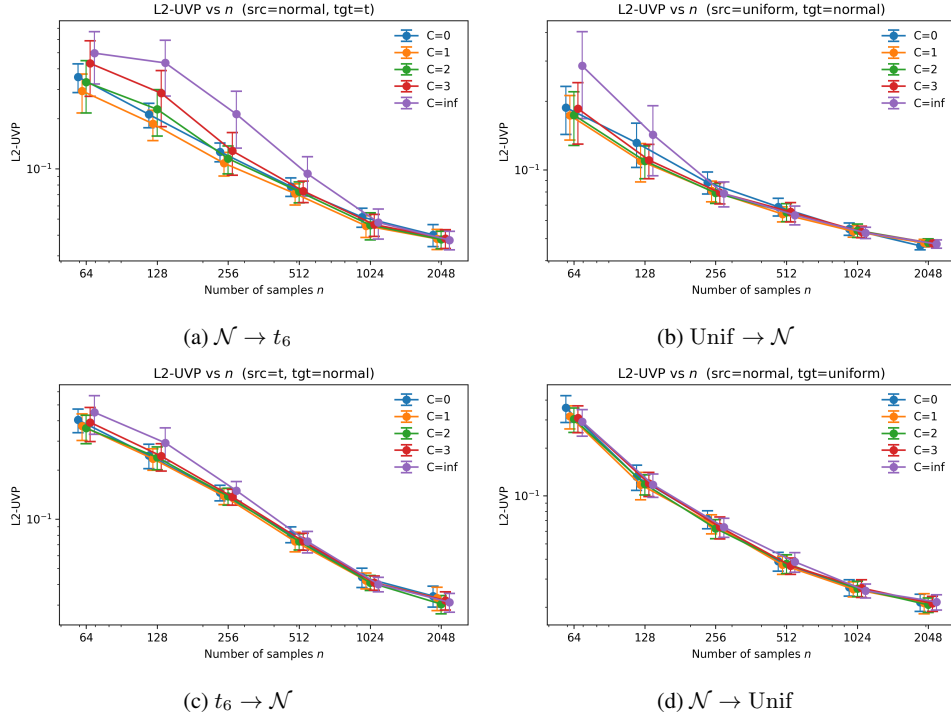

Figure 2:  $L^2\text{-UVP}$  when  $d = 5$ . Each curve shows the mean  $L^2\text{-UVP}$  over 50 random trials with one standard deviation.

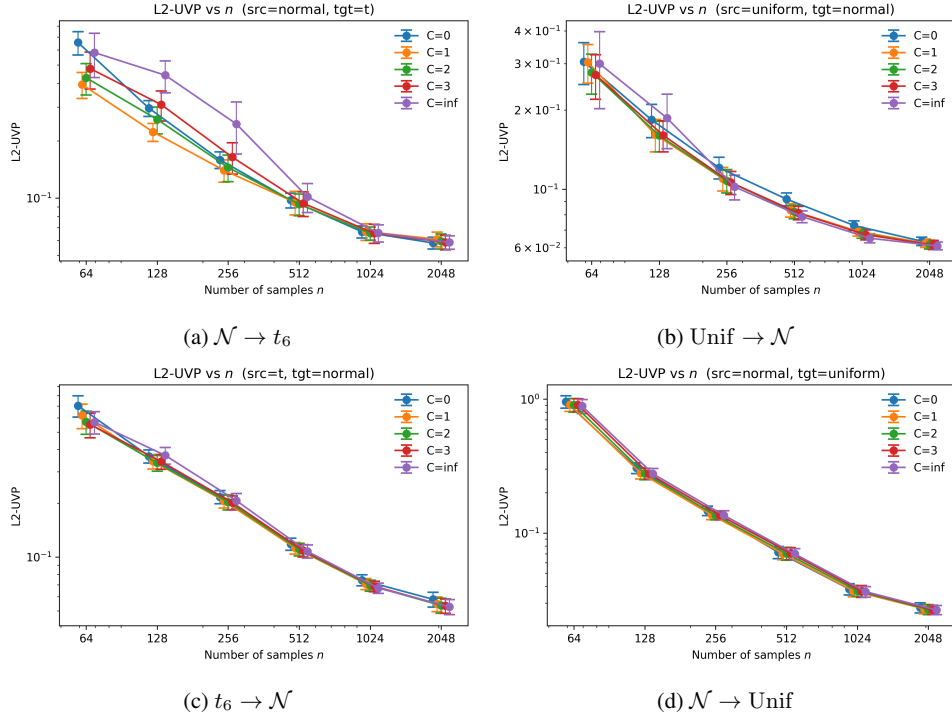

Figure 3:  $L^2$ -UVP when  $d = 10$ . Each curve shows the mean  $L^2$ -UVP over 50 random trials with one standard deviation.

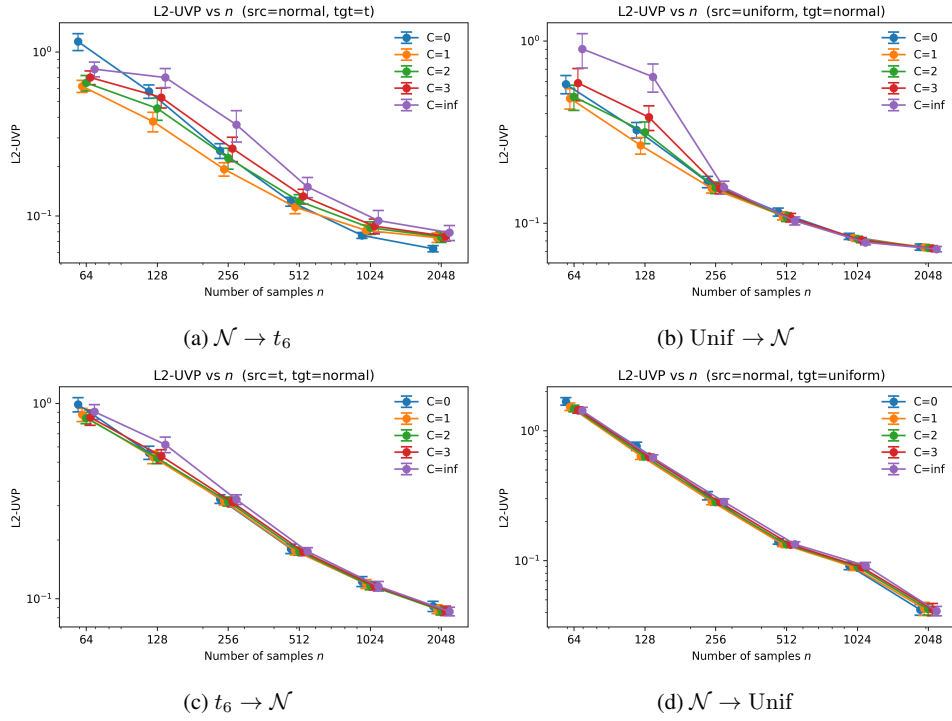

Figure 4:  $L^2$ -UVP when  $d = 20$ . Each curve shows the mean  $L^2$ -UVP over 50 random trials with one standard deviation.

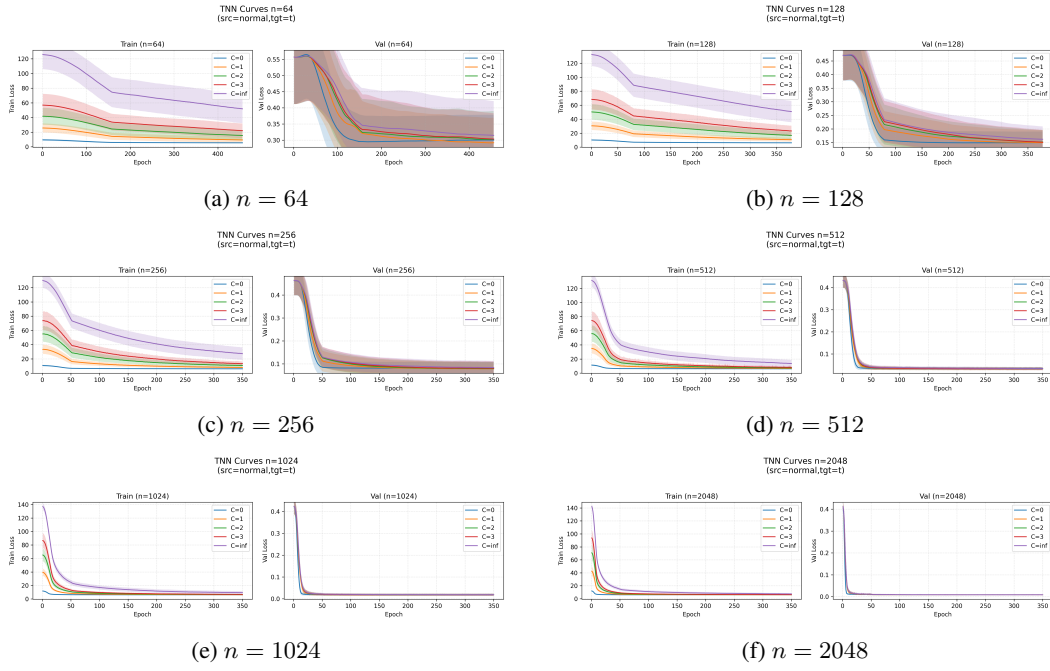

Figure 5: TNN training and validation loss curves for  $d = 5$ , source = Normal, target = Student- $t$ , across different sample sizes  $n$ .

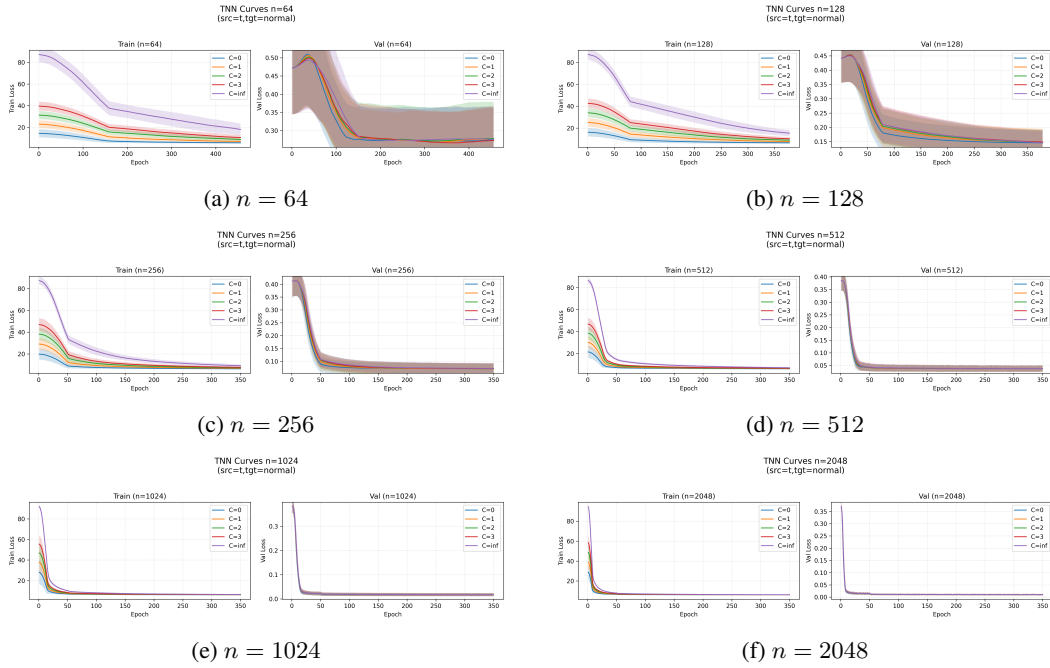

Figure 6: TNN training and validation loss curves for  $d = 5$ , source = Student- $t$ , target = Normal, across different sample sizes  $n$ .



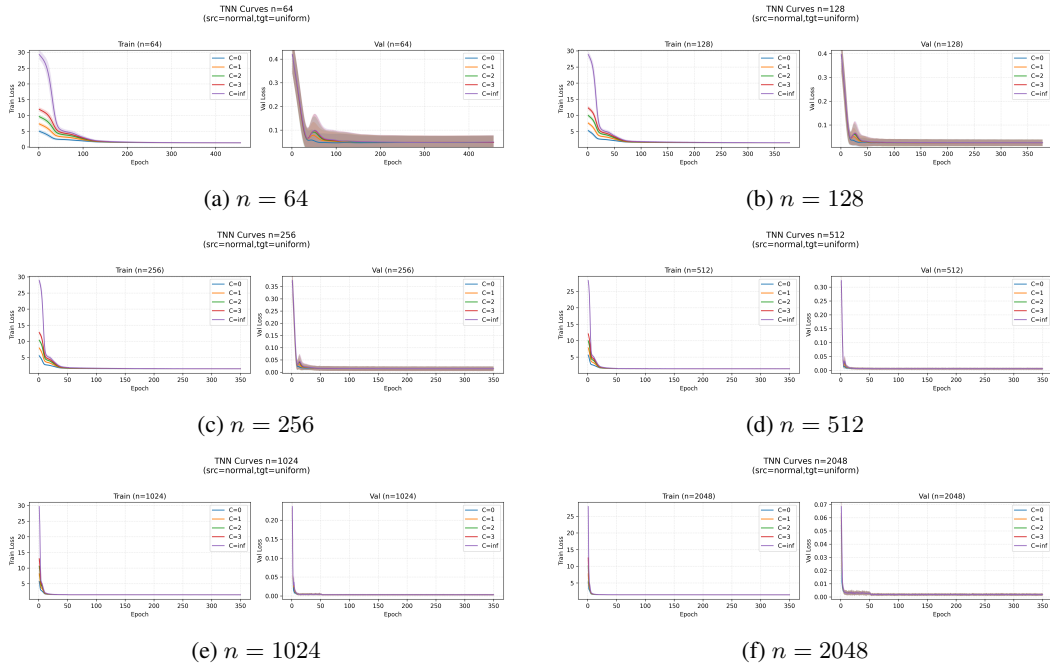

Figure 7: TNN training and validation loss curves for  $d = 5$ , source = Normal, target = Uniform, across different sample sizes  $n$ .

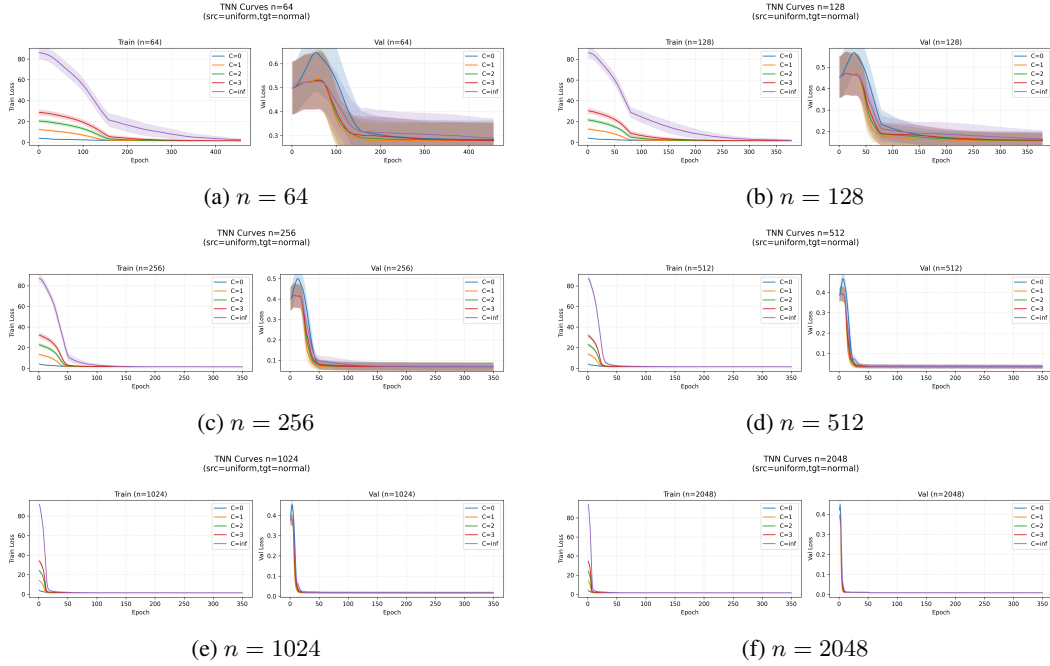

Figure 8: TNN training and validation loss curves for  $d = 5$ , source = Uniform, target = Normal, across different sample sizes  $n$ .

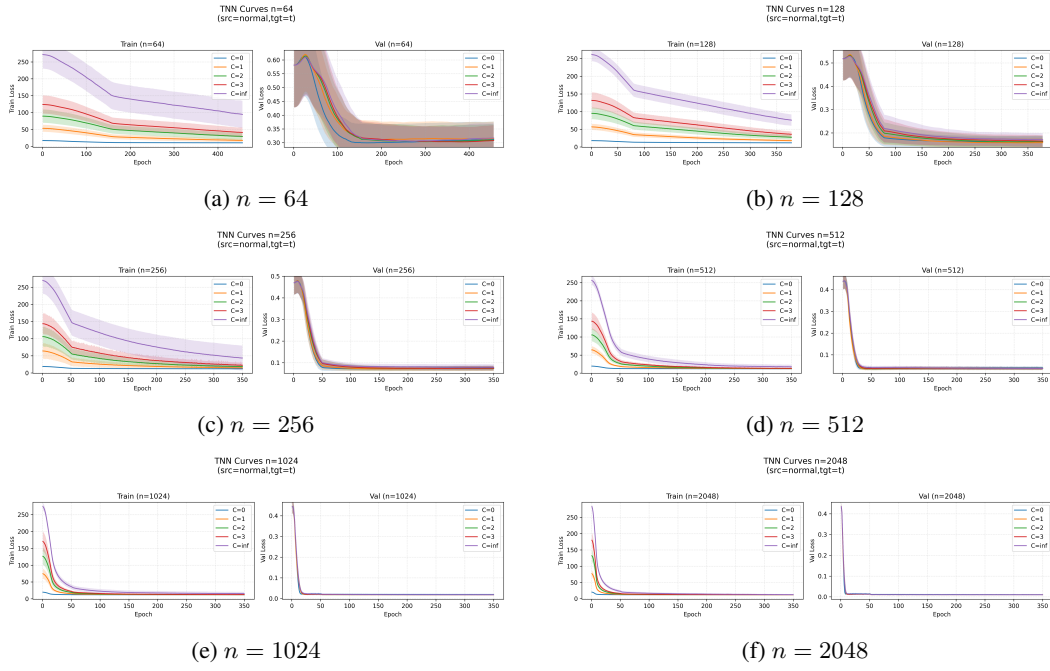

Figure 9: TNN training and validation loss curves for  $d = 10$ , source = Normal, target = Student- $t$ , across different sample sizes  $n$ .

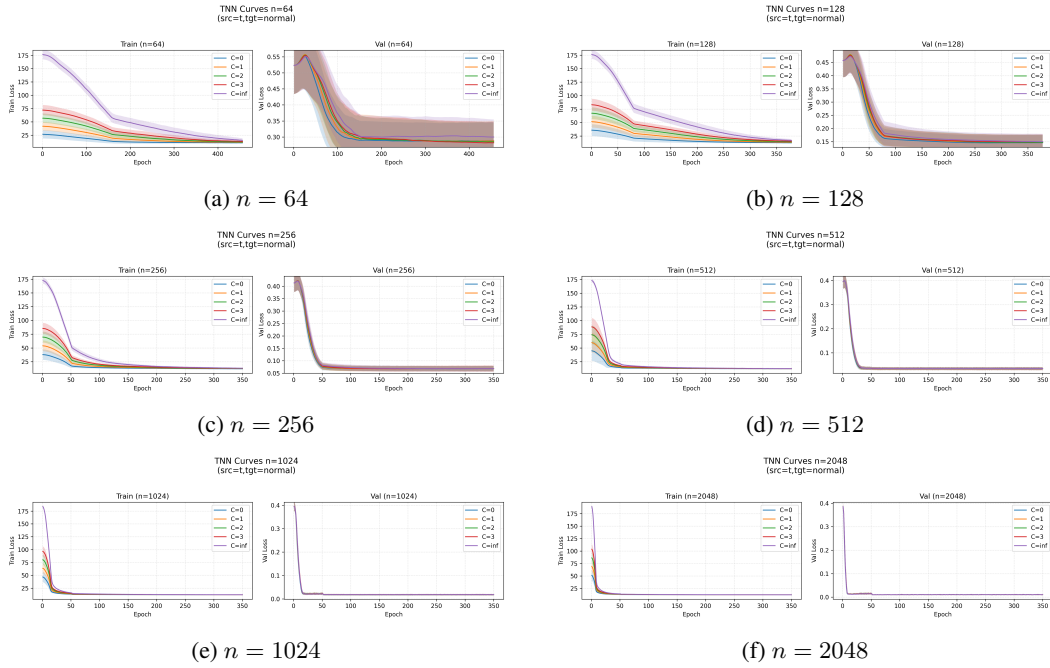

Figure 10: TNN training and validation loss curves for  $d = 10$ , source = Student- $t$ , target = Normal, across different sample sizes  $n$ .

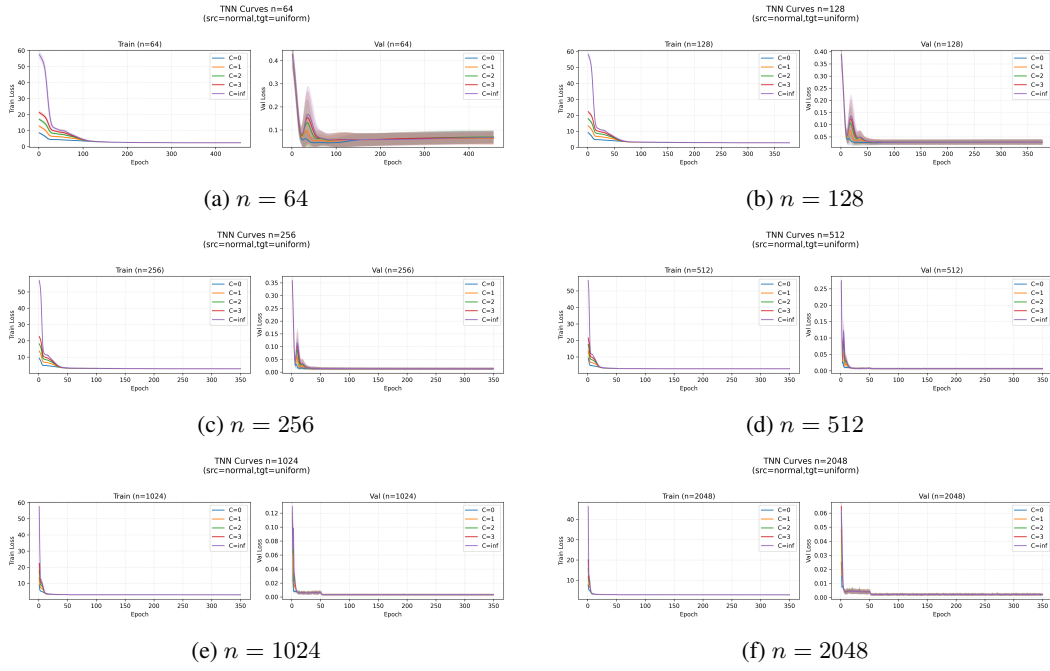

Figure 11: TNN training and validation loss curves for  $d = 10$ , source = Normal, target = Uniform, across different sample sizes  $n$ .

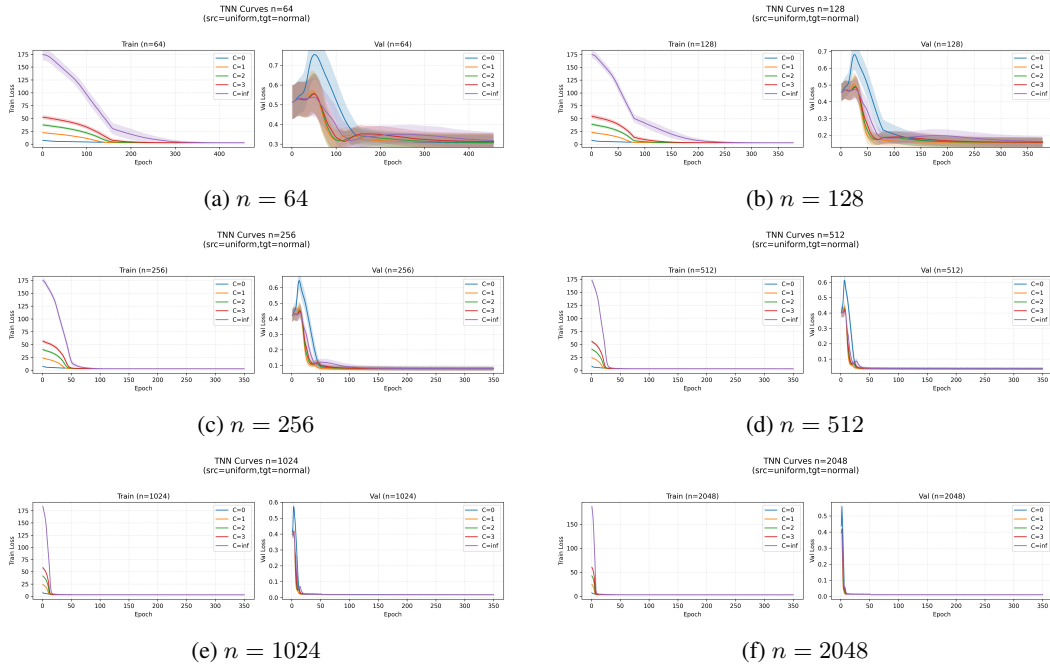

Figure 12: TNN training and validation loss curves for  $d = 10$ , source = Uniform, target = Normal, across different sample sizes  $n$ .

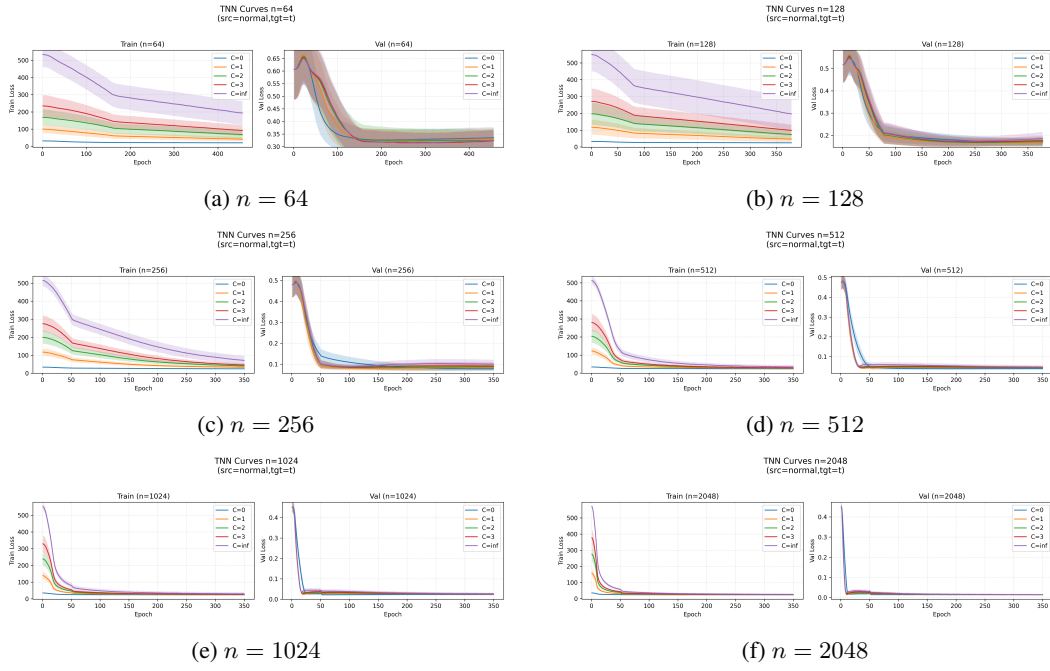

Figure 13: TNN training and validation loss curves for  $d = 20$ , source = Normal, target = Student- $t$ , across different sample sizes  $n$ .

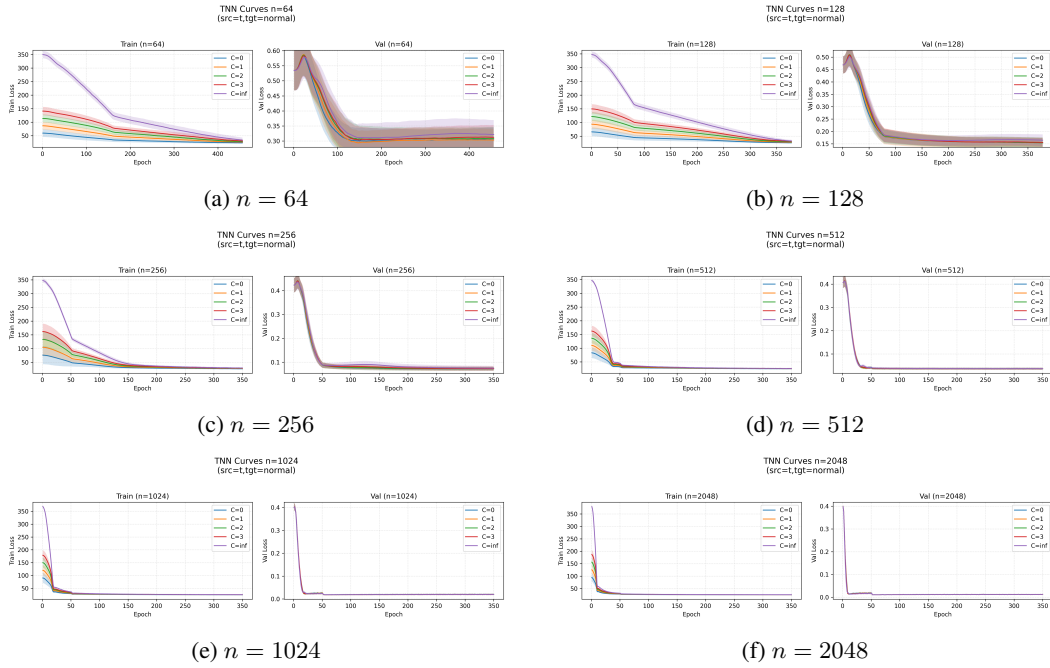

Figure 14: TNN training and validation loss curves for  $d = 20$ , source = Student- $t$ , target = Normal, across different sample sizes  $n$ .

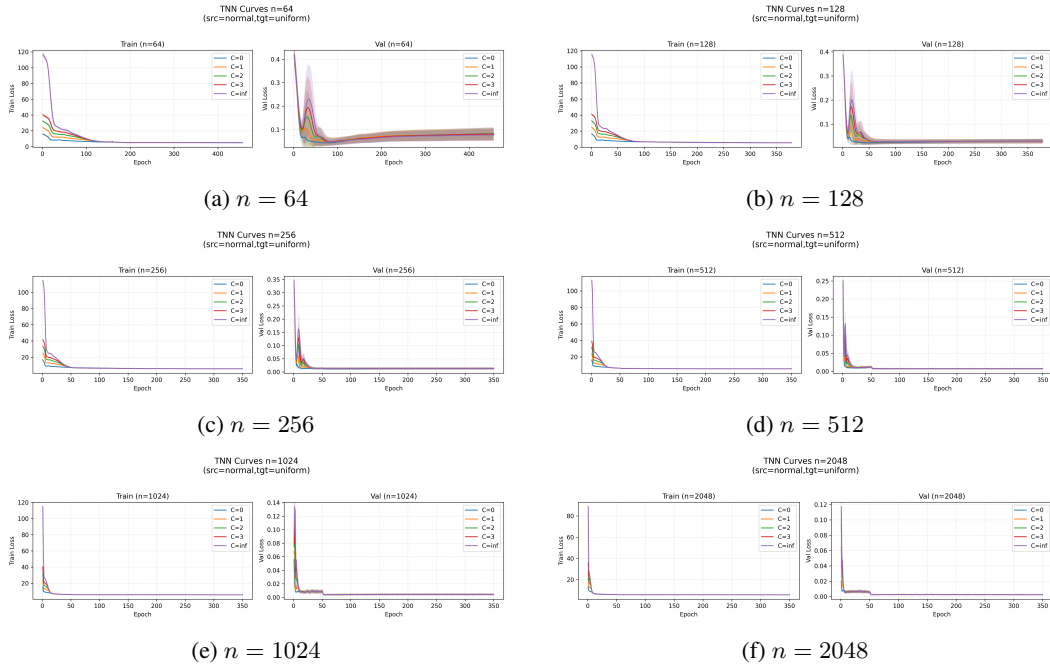

Figure 15: TNN training and validation loss curves for  $d = 20$ , source = Normal, target = Uniform, across different sample sizes  $n$ .

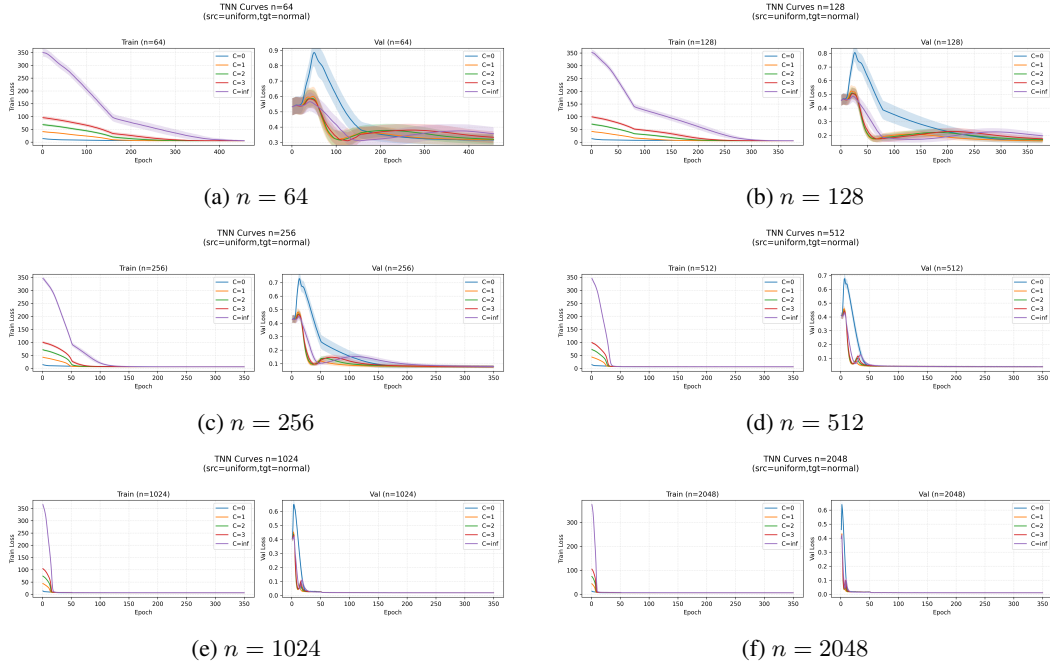

Figure 16: TNN training and validation loss curves for  $d = 20$ , source = Uniform, target = Normal, across different sample sizes  $n$ .

## Appendix References

- [1] Minshuo Chen, Wenjing Liao, Hongyuan Zha, and Tuo Zhao. Distribution approximation and statistical estimation guarantees of generative adversarial networks. *arXiv preprint arXiv:2002.03938*, 2020.
- [2] Maria Colombo and Max Fathi. Bounds on optimal transport maps onto log-concave measures. *Journal of Differential Equations*, 271:1007–1022, 2021.
- [3] Tim De Ryck, Samuel Lanthaler, and Siddhartha Mishra. On the approximation of functions by tanh neural networks. *Neural Networks*, 143:732–750, 2021.
- [4] Yizhe Ding, Runze Li, and Lingzhou Xue. Statistical convergence rates of optimal transport map estimation between general distributions. *arXiv preprint arXiv:2412.08064*, 2024.
- [5] Vincent Divol, Jonathan Niles-Weed, and Aram-Alexandre Pooladian. Optimal transport map estimation in general function spaces. *The Annals of Statistics*, 53(3):963–988, 2025.
- [6] Florian F Gunsilius. On the convergence rate of potentials of brenier maps. *Econometric Theory*, 38(2):381–417, 2022.
- [7] Jan-Christian Hütter and Philippe Rigollet. Minimax estimation of smooth optimal transport maps. *The Annals of Statistics*, 2021.
- [8] Alexander Korotin, Vage Egiazarian, Arip Asadulaev, Alexander Safin, and Evgeny Burnaev. Wasserstein-2 generative networks. In *International Conference on Learning Representations*, 2021.
- [9] Ilsang Ohn and Yongdai Kim. Smooth function approximation by deep neural networks with general activation functions. *Entropy*, 21(7):627, 2019.
- [10] A Paszke. Pytorch: An imperative style, high-performance deep learning library. *arXiv preprint arXiv:1912.01703*, 2019.
- [11] Jon Wellner. *Weak Convergence and Empirical Processes: with Applications to Statistics*. Springer Science & Business Media, 2013.
